# Supplementary material
Source: PubMed Central journal article supplement (PMC7499065)
Supplement: mmc2.pdf [file mmc2.pdf]

# Ca<sup>2+</sup> Release via IP<sub>3</sub> Receptors Shapes the Cardiac Ca<sup>2+</sup> Transient for Hypertrophic Signaling

Hilary Hunt,<sup>1</sup> Agn e Tilunait e,<sup>1</sup> Greg Bass,<sup>1</sup> Christian Soeller,<sup>2</sup> H. Llewelyn Roderick,<sup>3</sup> Vijay Rajagopal,<sup>4,\*</sup> and Edmund J. Crampin<sup>1,5,\*</sup>

<sup>1</sup>Systems Biology Laboratory, School of Mathematics and Statistics and Melbourne School of Engineering, University of Melbourne, Melbourne, Australia; <sup>2</sup>Living Systems Institute, University of Exeter, Exeter, United Kingdom; <sup>3</sup>Laboratory of Experimental Cardiology, Department of Cardiovascular Sciences, KU Leuven, Belgium; <sup>4</sup>Cell Structure and Mechanobiology Group, Department of Biomedical Engineering, Melbourne School of Engineering and <sup>5</sup>ARC Centre of Excellence in Convergent Bio-Nano Science and Technology, School of Chemical and Biomedical Engineering, University of Melbourne, Melbourne, Australia

**ABSTRACT** Calcium (Ca<sup>2+</sup>) plays a central role in mediating both contractile function and hypertrophic signaling in ventricular cardiomyocytes. L-type Ca<sup>2+</sup> channels trigger release of Ca<sup>2+</sup> from ryanodine receptors for cellular contraction, whereas signaling downstream of G-protein-coupled receptors stimulates Ca<sup>2+</sup> release via inositol 1,4,5-trisphosphate receptors (IP<sub>3</sub>Rs), engaging hypertrophic signaling pathways. Modulation of the amplitude, duration, and duty cycle of the cytosolic Ca<sup>2+</sup> contraction signal and spatial localization have all been proposed to encode this hypertrophic signal. Given current knowledge of IP<sub>3</sub>Rs, we develop a model describing the effect of functional interaction (cross talk) between ryanodine receptor and IP<sub>3</sub>R channels on the Ca<sup>2+</sup> transient and examine the sensitivity of the Ca<sup>2+</sup> transient shape to properties of IP<sub>3</sub>R activation. A key result of our study is that IP<sub>3</sub>R activation increases Ca<sup>2+</sup> transient duration for a broad range of IP<sub>3</sub>R properties, but the effect of IP<sub>3</sub>R activation on Ca<sup>2+</sup> transient amplitude is dependent on IP<sub>3</sub> concentration. Furthermore we demonstrate that IP<sub>3</sub>-mediated Ca<sup>2+</sup> release in the cytosol increases the duty cycle of the Ca<sup>2+</sup> transient, the fraction of the cycle for which [Ca<sup>2+</sup>] is elevated, across a broad range of parameter values and IP<sub>3</sub> concentrations. When coupled to a model of downstream transcription factor (NFAT) activation, we demonstrate that there is a high correspondence between the Ca<sup>2+</sup> transient duty cycle and the proportion of activated NFAT in the nucleus. These findings suggest increased cytosolic Ca<sup>2+</sup> duty cycle as a plausible mechanism for IP<sub>3</sub>-dependent hypertrophic signaling via Ca<sup>2+</sup>-sensitive transcription factors such as NFAT in ventricular cardiomyocytes.

**SIGNIFICANCE** Many studies have identified a role for inositol 1,4,5-trisphosphate receptor (IP<sub>3</sub>R)-mediated Ca<sup>2+</sup> signaling in cardiac hypertrophy; however, the signaling mechanism remains unclear. Here we present a mathematical model of functional interactions between ryanodine receptors (RyRs) and IP<sub>3</sub>Rs, and show that IP<sub>3</sub>-mediated Ca<sup>2+</sup> release can increase the Ca<sup>2+</sup> duty cycle, which has been shown experimentally to lead to NFAT activation and hypertrophic signaling. Through a parameter sensitivity analysis, we demonstrate that the duty cycle increases with IP<sub>3</sub> over a broad parameter regime, indicating that this mechanism is robust, and furthermore we show that increasing Ca<sup>2+</sup> duty cycle raises nuclear NFAT activation. These findings suggest a plausible mechanism for IP<sub>3</sub>R-dependent hypertrophic signaling in cardiomyocytes.

## INTRODUCTION

Calcium is a universal second messenger that plays a role in controlling many cellular processes across a wide variety of

cell types, ranging from fertilization, cell contraction, and cell growth to cell death (1,2). Precisely how Ca<sup>2+</sup> fulfills each of these roles while also ensuring signal specificity remains unclear in many cases. Ca<sup>2+</sup> can be used to transmit signals in a variety of ways. Signal localization and amplitude and frequency modulation have been widely explored (3–5); however, mechanisms for information encoding in the cumulative signal (i.e., area under the curve, proportional-integral-derivative controller, or duty cycle) have also been proposed (6–8). Determining which method of information encoding is relevant to a specific signaling

Submitted January 24, 2020, and accepted for publication August 4, 2020.

\*Correspondence: [vijay.rajagopal@unimelb.edu.au](mailto:vijay.rajagopal@unimelb.edu.au) or [edmund.crampin@unimelb.edu.au](mailto:edmund.crampin@unimelb.edu.au)

Vijay Rajagopal and Edmund J. Crampin contributed equally to the supervision of this work.

Editor: Eric Sobie.

<https://doi.org/10.1016/j.bpj.2020.08.001>

  2020 Biophysical Society.

pathway requires determining what type of signal encoding the system is capable of and whether the downstream effector of the signal is capable of temporal signal integration, high- or low-pass filtering, or threshold filtering.

In cardiac myocytes, discrete encoding of multiple Ca<sup>2+</sup>-mediated signals is particularly pertinent because of the essential and continuous role Ca<sup>2+</sup> plays in excitation-contraction coupling (ECC). Of particular significance is the involvement of Ca<sup>2+</sup> in hypertrophic growth signaling. How Ca<sup>2+</sup> can communicate a signal in the hypertrophic signaling pathway concurrent with the cytosolic Ca<sup>2+</sup> fluxes that drive cardiac muscle contraction is still largely unresolved (9,10). Understanding this mechanism is important because pathological hypertrophic remodeling is a precursor of heart failure and a common final pathway of cardiovascular diseases, including hypertension and coronary disease (11–13).

During each heartbeat, on depolarization of the membrane Ca<sup>2+</sup> enters the cell via L-type Ca<sup>2+</sup> channels (LTCCs), triggering larger Ca<sup>2+</sup> release from the sarcoplasmic reticulum (SR) via ryanodine receptors (RyRs), which then induces contraction. The activation of Ca<sup>2+</sup> release via RyRs by the Ca<sup>2+</sup> arising via LTCCs is known as calcium-induced calcium release and results in a 10-fold increase in cytosolic Ca<sup>2+</sup> concentration (relative to resting Ca<sup>2+</sup> concentration of ~100 nM). Sarcoendoplasmic reticulum Ca<sup>2+</sup> pumps (SERCA) and other Ca<sup>2+</sup> sequestration mechanisms subsequently withdraw the released Ca<sup>2+</sup> back into the SR and out of the cytosol (14,15), reverting

the cell to its relaxed state. Ca<sup>2+</sup> also plays a central role in hypertrophic signaling. Hypertrophic stimuli such as endothelin-1 (ET-1) bind to G-protein-coupled receptors at the cell membrane to stimulate generation of the intracellular signaling molecule inositol 1,4,5-trisphosphate (IP<sub>3</sub>). After IP<sub>3</sub> binds to and activates its cognate receptor, inositol 1,4,5-trisphosphate receptors (IP<sub>3</sub>R), on the SR and nuclear envelope, Ca<sup>2+</sup> is released into the cytosol and nucleus, respectively (see Fig. 1; (16,17)). This Ca<sup>2+</sup> signal arising from IP<sub>3</sub>R has been shown in multiple mammalian species to produce a distinct Ca<sup>2+</sup> signal that through activation of pro-hypertrophic pathways, including those involving nuclear factor of activated T cells (NFAT), induces hypertrophy within cardiomyocytes (16,18,19).

In healthy adult rat ventricular myocytes (ARVMs), various effects of IP<sub>3</sub> on global Ca<sup>2+</sup> transients associated with ECC have been described, summarized in Table 1. Although application of G-protein-coupled receptor agonists that stimulate IP<sub>3</sub> generation produces robust effects on ECC-associated IP<sub>3</sub> transients and contraction, the direct contribution of IP<sub>3</sub> to these actions varies between studies (17,20–24). For example, in rabbits the effect of ET-1 on Ca<sup>2+</sup> transient amplitude is sensitive to the IP<sub>3</sub>R inhibitor 2-APB (22), whereas in healthy rats, IP<sub>3</sub>R inhibition with 2-APB was without effect (25). In mice, 2-APB abrogated an increase in ECC-associated Ca<sup>2+</sup> transients brought about by AngII (24). Responses have also been variable when IP<sub>3</sub> was directly applied to cardiac myocytes. In healthy rats, IP<sub>3</sub> produced no or a modest effect on Ca<sup>2+</sup>

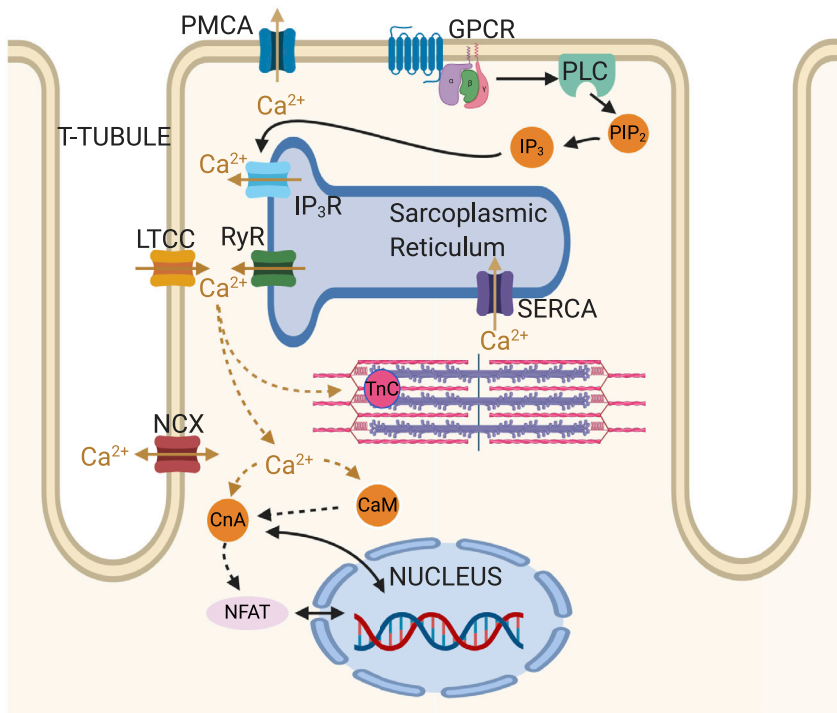

FIGURE 1 Schematic showing key Ca<sup>2+</sup> signaling pathways in the cardiomyocyte. ECC processes include ryanodine receptors (RyRs), L-type Ca<sup>2+</sup> channels (LTCCs), SERCA, sodium-calcium exchanger (NCX), sarcolemmal calcium pump (PMCA), and troponin C (TnC). Growth-related IP<sub>3</sub>-Ca<sup>2+</sup>/NFAT signaling processes include inositol 1,4,5-trisphosphate receptors (IP<sub>3</sub>R), G-protein-coupled receptor (GPCR), phospholipase C (PLC), phosphatidylinositol 4,5-bisphosphate (PIP<sub>2</sub>), calmodulin (CaM), calcineurin (CnA), and nuclear factor of activated T cells (NFAT). To see this figure in color, go online.

**TABLE 1** Summary of Experimentally Observed Changes to the Ca<sup>2+</sup> Transient in Normal Healthy Ventricular Myocytes in Rat and Other Species after Addition of IP<sub>3</sub> and ET-1

| Cell State    |                          | IP <sub>3</sub> | ET-1                 |
|---------------|--------------------------|-----------------|----------------------|
| Rat           | Amplitude:               | r▲(21) r◆(17)   | r▲(21) r◆(16) r▲(17) |
|               | Duration:                | –               | –                    |
|               | Basal Ca <sup>2+</sup> : | r◆(17)          | r◆(17)               |
|               | SCTs:                    | r▲(21) r▲(17)   | r▲(21) r▲(17)        |
| Other species | Amplitude:               | m▲(20) m◆(73)   | h▲(20) m▲(20)        |
|               | Duration:                | –               | –                    |
|               | Basal Ca <sup>2+</sup> : | m▲(73)          | m▲(20), b▲(22)       |
|               | SCTs:                    | –               | h▲(20) m▲(20)        |

SCT, spontaneous Ca<sup>2+</sup> transient. ▲ indicates an increase, ▼ a decrease, and ◆ indicates no significant change reported; r indicates rat, b indicates rabbit, h indicates human, and m indicates mouse; dashes indicate no data found. The model developed in this work is primarily parameterized with rat data.

transient amplitude (17,21), whereas in rabbits (22), a more substantial effect was observed. These differences in the effect of IP<sub>3</sub> have been ascribed in part to the greater dependence of rat myocytes on SR Ca<sup>2+</sup> release to the Ca<sup>2+</sup> transient than rabbit myocytes (22). Notably, both ET-1 and IP<sub>3</sub> elicit arrhythmogenic effects whereby they promote the generation of spontaneous calcium transients, manifest as a prolonged Ca<sup>2+</sup> transient with additional peaks, and increase the frequency of Ca<sup>2+</sup> sparks (17,18,21,22). A more profound role for IP<sub>3</sub> signaling is observed in hypertrophic ventricular myocytes, with ECC-associated Ca<sup>2+</sup> transients of greater amplitude reported. Underlying these effects, IP<sub>3</sub>R expression is elevated in hypertrophy (26). Hence, a question remains as to what independent effect IP<sub>3</sub>R activation has on the cytosolic Ca<sup>2+</sup> transient in healthy ventricular cardiac myocytes.

The individual behavior of IP<sub>3</sub>R channels and their dependence on Ca<sup>2+</sup>, IP<sub>3</sub>, and ATP in cardiac and other cell types has been explored in a number of studies (27–30). These studies have formed the basis of several computational models of IP<sub>3</sub>R type I isoforms (29,31,32) fitted to stochastic single-channel data (33). However, properties of IP<sub>3</sub>R channel activity within the cardiomyocyte, such as gating state transition rates and their dependency on IP<sub>3</sub> and Ca<sup>2+</sup>, have not been directly measured. In this study, we have taken the experimental studies on rat ventricular cardiomyocytes as a reference point for the observed effects of IP<sub>3</sub>R activation on cellular Ca<sup>2+</sup> dynamics and extended a well-established model of beat-to-beat cytosolic Ca<sup>2+</sup> transients in rat cardiac cells (14,34) to include a model of type II IP<sub>3</sub>R (32) channels. This deterministic, compartmental model of ECC enables us to investigate biophysically plausible mechanisms by which IP<sub>3</sub>R activation could affect Ca<sup>2+</sup> dynamics at the whole-cell scale while avoiding the computational complexity associated with detailed stochastic and spatial modeling. Specifically, it enables us to explore the parameter ranges of IP<sub>3</sub>R-mediated Ca<sup>2+</sup> release that modify the global cytosolic Ca<sup>2+</sup> transient to encode information for hypertrophic signaling to the nucleus.

A number of transcription factors transduce changes in Ca<sup>2+</sup> to activate hypertrophic gene transcription. Of particular note is NFAT. There are five known NFAT isoforms ex-

pressed in mammals; four of these are found in cardiac cells (19,35). To initiate hypertrophic remodeling, the hypertrophic Ca<sup>2+</sup> signal, in conjunction with calmodulin (CaM) and calcineurin (CaN), leads to dephosphorylation of cytosolic NFAT. Upon dephosphorylation, NFAT translocates to the nucleus, where, in coordination with other proteins, it activates expression of genes responsible for hypertrophy (36). Several studies have focused on characterizing the Ca<sup>2+</sup> dynamics necessary to activate NFAT and initiate hypertrophy (8,19,37–42) and have shown NFAT to be a Ca<sup>2+</sup> signal integrator (37). Furthermore, a recent study by Hannanta-anan and Chow (8) used direct optogenetic control of cytosolic Ca<sup>2+</sup> transients in HeLa cells to demonstrate that the transcriptional activity of NFAT4 (also known as NFATc3), a necessary NFAT isoform in the hypertrophic pathway (35), can be upregulated by increasing the residence time of Ca<sup>2+</sup> in the cytosol within each oscillation. The increased residence time of Ca<sup>2+</sup>, referred to as the “duty cycle,” is the ratio between the area under the Ca<sup>2+</sup> transient curve divided by the maximal possible area, as calculated by the product of transient amplitude and period (see Fig. 2A). The Ca<sup>2+</sup> duty cycle is therefore distinct from the average Ca<sup>2+</sup> concentration. Hannanta-anan and Chow (8) showed that increasing the duty cycle had a proportionally greater effect on NFAT transcriptional activity than changing either the frequency or amplitude of the cytosolic Ca<sup>2+</sup> oscillations. This suggests an increased Ca<sup>2+</sup> duty cycle as a possible mechanism by which Ca<sup>2+</sup> release through IP<sub>3</sub>R channels can affect hypertrophic signaling.

Here, using a mathematical model of beat-to-beat cytosolic Ca<sup>2+</sup> transients in rat ventricular myocytes, coupled to IP<sub>3</sub>R channel Ca<sup>2+</sup> release, we show that IP<sub>3</sub>R activation in the cytosol can increase the duty cycle of the cytosolic Ca<sup>2+</sup> transient. We establish model feasibility through parameter sensitivity analysis, which shows that this behavior does not depend sensitively on model parameter values. Furthermore, we identify conditions necessary for IP<sub>3</sub>R channel activation to alter Ca<sup>2+</sup> transient amplitude, width, basal Ca<sup>2+</sup>, and duty cycle, as identified in different experimental studies, and compare model simulations to published experimental data summarized in Table 1. Finally, we couple simulations of cytosolic Ca<sup>2+</sup> dynamics to a

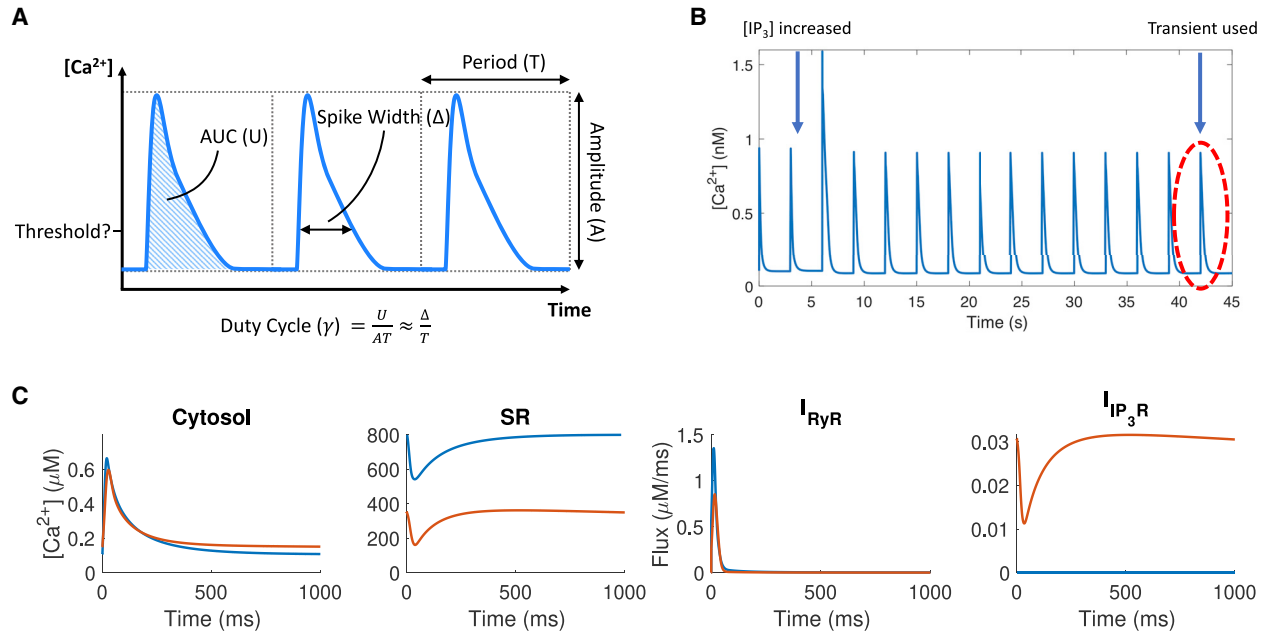

FIGURE 2 (A) The duty cycle, a function of area under the curve, amplitude, and period, for the cytosolic  $Ca^{2+}$  transient. (B) An example of  $Ca^{2+}$  transients generated by the model is shown. (C)  $Ca^{2+}$  concentration in cytosol and SR, RyR flux, and IP<sub>3</sub>R flux in the model with elevated IP<sub>3</sub> (red) and without IP<sub>3</sub> (blue) are shown. Here, IP<sub>3</sub>R parameters used are taken from (32), with maximal IP<sub>3</sub>R flux  $k_f = 0.003 \mu\text{m}^3 \text{ms}^{-1}$ . To see this figure in color, go online.

model of downstream CaM/CnA/NFAT activation and show that the duty cycle of the  $Ca^{2+}$  transient highly correlates with the activated nuclear NFAT (the proportion of NFAT that is dephosphorylated and translocated to the nucleus). These findings suggest IP<sub>3</sub>R activity can increase the cytosolic  $Ca^{2+}$  duty cycle, thus providing a mechanism for IP<sub>3</sub>-dependent activation of NFAT for hypertrophic signaling in the cardiomyocyte.

## METHODS

We developed a computational model of RyR- and IP<sub>3</sub>R-mediated  $Ca^{2+}$  fluxes in the adult rat ventricular myocyte. Model simulations were performed using the ode15s ODE solver from MATLAB 2017b (The MathWorks, Natick, MA) with relative and absolute tolerances  $1 \times 10^{-3}$  and  $1 \times 10^{-6}$ , respectively. The model equations were simulated at 1 Hz, the original pacing frequency of the Hinch et al. (14) model, and at 0.3 Hz because it is another common pacing frequency in experimental studies of IP<sub>3</sub> and  $Ca^{2+}$  in cardiomyocytes (17,21). The model was paced until the normalized root mean-square deviation between each subsequent beat was below  $1 \times 10^{-3}$ , and all but the last oscillation were discarded to eliminate transient behaviors (see Fig. 2 B). Initial conditions were set to the basal  $Ca^{2+}$  level of the model at dynamic equilibrium with inactive IP<sub>3</sub>R channels, determined after running the base model until the normalized root mean-square deviation was also below  $1 \times 10^{-3}$ .

## Model equations

The compartmental model of rat left ventricular cardiac myocyte  $Ca^{2+}$  dynamics is based on the Hinch et al. (14) model of ECC, with the addition of IP<sub>3</sub>R  $Ca^{2+}$  release modeled using the Siekmann-Cao-Sneyd model (32). The Hinch model is an established whole-cell model of rat cardiac  $Ca^{2+}$  dynamics that describes the flux through the major  $Ca^{2+}$  channels and

pumps on the cell and SR membranes and the effects of applying a voltage across the cell membrane. The parameters for the Hinch component of our model were maintained from the original, except for those of the driving voltage. This was shortened to better approximate the rat action potential (43) (see Fig. S1). The  $Ca^{2+}$  in the cytosol is governed by the following ODE:

$$\frac{d[Ca^{2+}]_{\text{cyt}}}{dt} = \beta_{\text{fluo}} \times \beta_{\text{CaM}} \times (I_{\text{CaL}} + I_{\text{RyR}} - I_{\text{SERCA}} + I_{\text{IP}_3\text{R}} + I_{\text{other}}), \quad (1)$$

$$I_{\text{other}} = I_{\text{SR1}} + I_{\text{NCX}} - I_{\text{PMCA}} + I_{\text{CaB}} + I_{\text{TnC}}. \quad (2)$$

A small  $Ca^{2+}$  flux through the LTCCs,  $I_{\text{CaL}}$ , activates RyR channels to release  $Ca^{2+}$  from the SR into the cytosol at a rate of  $I_{\text{RyR}}$ .  $Ca^{2+}$  is resequenced into the SR by SERCA at a rate  $I_{\text{SERCA}}$ .  $\beta_{\text{fluo}}$  is the rapid buffer coefficient (44) for the fluorescent dye in the cytosol, and  $\beta_{\text{CaM}}$  is the rapid buffer coefficient for calmodulin in the cytosol.  $I_{\text{other}}$  includes  $Ca^{2+}$  fluxes such as exchange with the extracellular environment through the sodium-calcium exchanger  $I_{\text{NCX}}$ , sarcolemmal  $Ca^{2+}$ -ATPase  $I_{\text{PMCA}}$ , and the background leak current  $I_{\text{CaB}}$ , as well as the SR leak current  $I_{\text{SR1}}$  and buffering on troponin C  $I_{\text{TnC}}$ . These fluxes are defined in the Supporting Materials and Methods.

When the simulation is run with IP<sub>3</sub> present, there is additionally a flux through the IP<sub>3</sub>Rs:

$$I_{\text{IP}_3\text{R}} = k_f \times N_{\text{IP}_3\text{R}} \times P_{\text{IP}_3\text{R}} \times \left( [Ca^{2+}]_{\text{SR}} - [Ca^{2+}]_{\text{cyt}} \right) / V_{\text{myo}}. \quad (3)$$

Here,  $V_{\text{myo}}$  is the volume of the cell.  $k_f$  is the maximal total flux through each IP<sub>3</sub>R channel; this was chosen to be  $0.45 \mu\text{m}^3 \text{ms}^{-1}$  unless otherwise stated to create a measurable effect on IP<sub>3</sub>R channel activation while

maintaining plausible total flux.  $N_{IP_3R}$  is the number of IP<sub>3</sub>R channels in the cell; this was set to 1/50th of the number of RyR channels (45). We studied the effect of varying  $k_f$  on IP<sub>3</sub>-induced changes to the cytosolic Ca<sup>2+</sup> transient in normal cardiomyocytes. Evidently, varying  $N_{IP_3R}$  and varying  $k_f$  have the same effect on simulated calcium dynamics. Although  $N_{IP_3R}$  is known to increase significantly in disease conditions, we have not emphasized it in this study because of our focus on normal cardiomyocytes.  $[Ca^{2+}]_{cvt}$  and  $[Ca^{2+}]_{SR}$  are the Ca<sup>2+</sup> concentrations in the cytosol and SR, respectively.

$P_{IP_3R}$  is the  $[Ca^{2+}]$ - and  $[IP_3]$ -dependent open probability of the IP<sub>3</sub>R channels and is determined using the Siekmann-Cao-Sneyd model (31,32,46), which has a built-in delay in response to changing Ca<sup>2+</sup> concentration, along with several parameters governing channel activation and inactivation. This model describes  $P_{IP_3R}$  as

$$P_{IP_3R} = \beta / (\beta + k_\beta \times (\beta + \alpha)), \quad (4)$$

where  $k_\beta$  is a transition term derived from single-channel Siekmann et al. (46) and  $\beta$  describes the rate of activation and  $\alpha$  the rate of inactivation:

$$\beta = B \times m \times h, \quad (5)$$

$$\alpha = (1 - B) \times (1 - m \times h_\infty), \quad (6)$$

where  $h$  is time dependent and  $B$ ,  $m$ , and  $h$  and  $h_\infty$  describe the dependence on IP<sub>3</sub>, the dependence on Ca<sup>2+</sup>, and the Ca<sup>2+</sup>-dependent delay in IP<sub>3</sub>R gating, respectively. Expressions for these variables are as follows:

$$B = [IP_3]^2 / (K_p^2 + [IP_3]^2), \quad (7)$$

$$m = [Ca^{2+}]^4 / (K_c^4 + [Ca^{2+}]^4), \quad (8)$$

$$\frac{dh}{dt} = ((h_\infty - h) \times (K_t^4 + [Ca^{2+}]^4)) / (t_{max} \times K_t^4), \quad (9)$$

$$h_\infty = K_h^4 / (K_h^4 + [Ca^{2+}]^4). \quad (10)$$

Here,  $K_c$  and  $K_h$  are parameters that determine the Ca<sup>2+</sup>-dependence of IP<sub>3</sub>R channel open probability, whereas  $K_t$  and  $t_{max}$  are parameters that affect the delay in IP<sub>3</sub>R response to cytosolic changes.  $K_t$  determines the influence of  $[Ca^{2+}]$  on the delay, whereas  $t_{max}$  is a temporal scaling factor.

We note that the SR leak flux,  $I_{SR1}$ , is unchanged from the Hinch model and would include the effects of diastolic IP<sub>3</sub>R Ca<sup>2+</sup> release at normal IP<sub>3</sub> levels because that model did not explicitly include IP<sub>3</sub>R. However, in the presence of IP<sub>3</sub>, IP<sub>3</sub>R Ca<sup>2+</sup> flux during diastole is several orders of magnitude greater than  $I_{SR1}$ , which is largely dependent on  $[Ca^{2+}]_{SR}$ , and hence, any discrepancy caused by this will have a negligible effect on overall Ca<sup>2+</sup> dynamics within the cell (see also Fig. S4).

Several experimental studies have investigated IP<sub>3</sub>R activity across a range of Ca<sup>2+</sup> concentrations with 1  $\mu$ M IP<sub>3</sub> (27,47). These studies suggest that IP<sub>3</sub>R channels would be open, with almost constant  $P_{IP_3R}$  over the full range of cytosolic Ca<sup>2+</sup> concentrations experienced during ECC in the cardiomyocyte. An IP<sub>3</sub>R-facilitated SR-Ca<sup>2+</sup> leak has been reported to amplify systolic concentrations (48,49), as seen in most published experiments of IP<sub>3</sub>-enhanced Ca<sup>2+</sup> transients tabulated in Table 1. Through parameter sensitivity analysis of this model, we show that to be consistent with these observations,  $P_{IP_3R}$  must be significantly smaller at resting Ca<sup>2+</sup> concentrations than at higher concentrations.

## Coupling cytosolic Ca<sup>2+</sup> and NFAT activation

We coupled the calcium model to the NFAT model developed by Cooling et al. (50), which determines the proportion of total cellular NFAT that is dephosphorylated and translocated to the nucleus for a given cytosolic Ca<sup>2+</sup> signal. In this study, we have used the model parameters estimated from the data in Tomida et al. (37), who measured activation of NFAT4 in BHK cells. Full details of the Cooling et al. (50) model are given in the Supporting Materials and Methods.

## RESULTS

An example of the model output when run with the original IP<sub>3</sub>R channel parameter values determined by Sneyd et al. (32) for type I IP<sub>3</sub>R channels is shown in Fig. 2 C. Measurements of the properties of IP<sub>3</sub>R channel activity and their dependence on Ca<sup>2+</sup> within cardiomyocytes are sparse in the literature. Therefore, we performed a parameter sensitivity analysis by running model simulations over a variety of parameter ranges to explore the dependence of features of the cytosolic calcium transient to IP<sub>3</sub>R channel parameters.

### Parameter sensitivity analysis

We conducted a parameter sensitivity analysis to determine the critical parameters related to IP<sub>3</sub>R activation that affect the shape of beat-to-beat cytosolic Ca<sup>2+</sup> transients. We used the Jansen method (51) as described in Saltelli et al. (52) (and summarized in the Supporting Materials and Methods) to calculate the “main effect” and “total effect” coefficients of each of the parameters associated with IP<sub>3</sub>R channel gating in relation to changes in transient amplitude, full duration at half maximum (FDHM), diastolic Ca<sup>2+</sup>, and duty cycle (see Table 2). Saltelli et al. (52) describe the main effect coefficient as “the expected reduction in variance that would be obtained if [the parameter] could be fixed” and the total effect coefficient as “the expected variance that would be left if all factors but [the parameter]

**TABLE 2 Main and Total Effects of the IP<sub>3</sub>R Gating Parameters on Ca<sup>2+</sup> Transient Amplitude, Duration, Diastolic Ca<sup>2+</sup>, and Duty Cycle**

| Main Effect Coefficients   | [IP <sub>3</sub> ] | $t_{max}$ | $K_c$             | $K_h$             | $K_t$ | $k_f$             |
|----------------------------|--------------------|-----------|-------------------|-------------------|-------|-------------------|
| Amplitude                  | 0.27 <sup>a</sup>  | 0.00      | 0.03              | 0.19 <sup>a</sup> | 0.00  | 0.03              |
| Duration (FDHM)            | 0.17 <sup>a</sup>  | 0.00      | 0.01              | 0.12 <sup>a</sup> | 0.00  | 0.50 <sup>a</sup> |
| Diastolic Ca <sup>2+</sup> | 0.44 <sup>a</sup>  | 0.00      | 0.09              | 0.03              | 0.00  | 0.04              |
| Duty cycle                 | 0.23 <sup>a</sup>  | 0.00      | 0.01              | 0.16 <sup>a</sup> | 0.00  | 0.33 <sup>a</sup> |
| Total Effect Coefficients  | [IP <sub>3</sub> ] | $t_{max}$ | $K_c$             | $K_h$             | $K_t$ | $k_f$             |
| Amplitude                  | 0.63 <sup>a</sup>  | 0.04      | 0.43 <sup>a</sup> | 0.46 <sup>a</sup> | 0.02  | 0.13 <sup>a</sup> |
| Duration (FDHM)            | 0.33 <sup>a</sup>  | 0.00      | 0.19 <sup>a</sup> | 0.19 <sup>a</sup> | 0.00  | 0.54 <sup>a</sup> |
| Diastolic Ca <sup>2+</sup> | 0.79 <sup>a</sup>  | 0.00      | 0.45 <sup>a</sup> | 0.06              | 0.00  | 0.18 <sup>a</sup> |
| Duty cycle                 | 0.45 <sup>a</sup>  | 0.00      | 0.25 <sup>a</sup> | 0.24 <sup>a</sup> | 0.00  | 0.38 <sup>a</sup> |

Duration measured in FDHM.

<sup>a</sup>Significant values.

could be fixed,” both normalized by the total variance. Both coefficients are included here to provide a complete picture of the impact of each parameter. Simulation parameter values were generated using the MATLAB (The MathWorks) `sobolset` function with  $1 \times 10^3$  and skip  $1 \times 10^2$ .

### Variance-based parameter sensitivity analysis

Table 2 shows that the delay parameters  $t_{max}$  and  $K_I$  do not have a large effect on the cytosolic  $Ca^{2+}$  transient. Although they are necessary to describe the effect of IP<sub>3</sub>R-dominated  $Ca^{2+}$  dynamics (32), they contribute only a small amount to the variance. Therefore, we decided to fix these parameters in our simulations.

As expected, the coefficients show that cardiac cell  $Ca^{2+}$  dynamics during ECC are most highly sensitive to IP<sub>3</sub> concentration ( $[IP_3]$ ) and the maximal flux through each IP<sub>3</sub>R

( $k_f$ ). The maximal flux  $k_f$  has little effect on transient amplitude but large influence on duration and duty cycle, whereas  $[IP_3]$  has the greatest effect on the change in amplitude and diastolic  $Ca^{2+}$  concentration.

The gating parameters  $K_C$  and  $K_h$  also influence the cytosolic  $Ca^{2+}$  transient.  $K_h$  affects the  $[Ca^{2+}]$  at which IP<sub>3</sub>R channels are inhibited, and  $K_C$  affects the  $[Ca^{2+}]$  at which IP<sub>3</sub>R channels open. We illustrate how these two parameters affect IP<sub>3</sub>R open probability,  $P_{IP_3R}$ , in Fig. 3. Fig. 3 also shows how  $[IP_3]$  affects the relationship between  $K_C$ ,  $K_h$ ,  $[Ca^{2+}]$ , and  $P_{IP_3R}$ . It can be seen that with  $K_h = 80$  nM,  $P_{IP_3R}$  will be close to zero regardless of the values of  $Ca^{2+}$  or  $[IP_3]$  or  $K_C$ . At  $K_h = 1.6 \mu M$  and  $[IP_3] \geq 5 \mu M$ ,  $P_{IP_3R}$  dependence on  $K_C$  and  $Ca^{2+}$  becomes apparent. Finally, at  $K_h = 3.2 \mu M$ ,  $P_{IP_3R}$  is still dependent on  $K_C$ - and  $Ca^{2+}$ -values, but  $[IP_3]$  does not change  $P_{IP_3R}$  significantly.

From this analysis, we determine that for IP<sub>3</sub>R channels to be active during ECC,  $K_h$  must be sufficiently high that

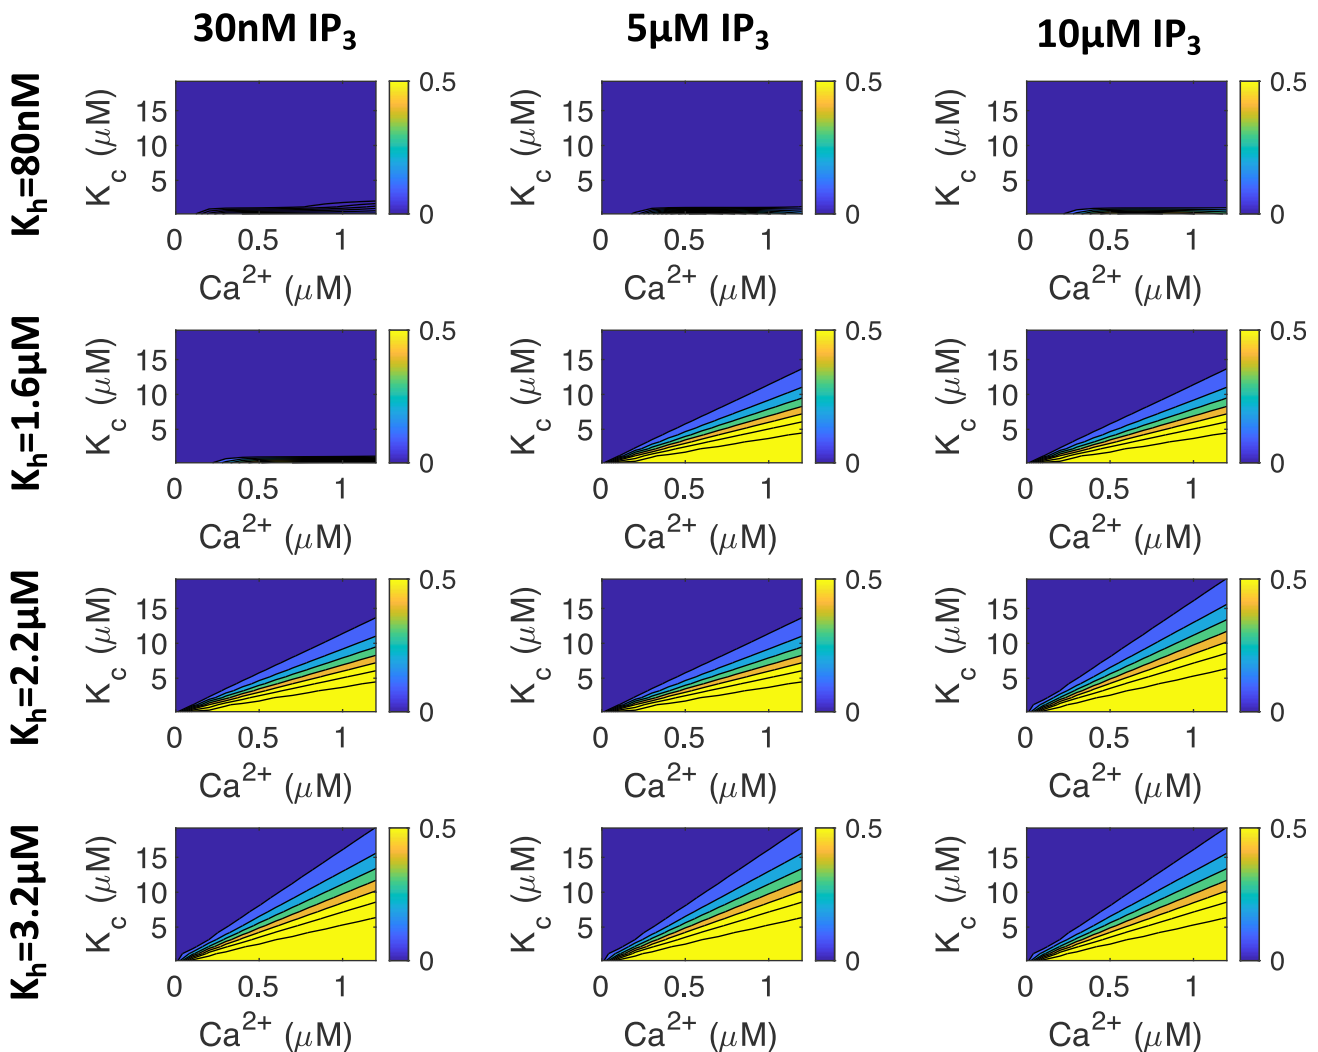

FIGURE 3 The effect of  $[Ca^{2+}]$ ,  $[IP_3]$ ,  $K_C$ , and  $K_h$  on  $P_{IP_3R}$  in the Siekmann-Cao-Sneyd IP<sub>3</sub>R model (31,32,46). The colored bars on the side of each plot show the proportion of IP<sub>3</sub>R channels that will open for each set of parameters at steady state. Note that IP<sub>3</sub>R channels do not open at physiological  $Ca^{2+}$  concentrations when  $K_h$  is low (i.e., 80 nM or less). In subsequent simulations, we used the value  $K_h = 2.2 \mu M$  unless otherwise stated. To see this figure in color, go online.

IP<sub>3</sub>R channels are not inhibited at diastolic [Ca<sup>2+</sup>]. Conversely,  $K_c$  must be low enough that IP<sub>3</sub>R channels are active at Ca<sup>2+</sup> concentrations below the systolic Ca<sup>2+</sup> peak. Therefore, in the remainder of this study, we fix  $K_h$  at 2.2  $\mu$ M: high enough to fulfill this condition but low enough that IP<sub>3</sub>R channels are still affected by [IP<sub>3</sub>]. We report simulation results only within the range of  $K_c$  that exhibits experimentally plausible Ca<sup>2+</sup> transient properties.

With the plausible range of  $K_h$  and  $K_c$  established, we next show the effect of  $K_c$ ,  $k_f$ , and [IP<sub>3</sub>] on the ECC transient.

### IP<sub>3</sub> concentration and IP<sub>3</sub>R opening behavior have the greatest impact on the Ca<sup>2+</sup> transient

As summarized in Table 1, different experimental studies suggest different effects of IP<sub>3</sub>R activation on the ECC cytosolic Ca<sup>2+</sup> transient. Fig. 4, A–C show quantitative predictions of how much Ca<sup>2+</sup> transient properties could be affected by IP<sub>3</sub>R activation across a range of [IP<sub>3</sub>]- and Ca<sup>2+</sup>-dependent IP<sub>3</sub>R gating parameter  $K_c$ -values.  $k_f$  was fixed at 0.45  $\mu$ m<sup>3</sup> ms<sup>-1</sup>, and  $K_h$  was fixed at 2.2  $\mu$ M.

The red region in Fig. 4 A corresponds to IP<sub>3</sub>R activation parameters that produce the greatest increase in Ca<sup>2+</sup> amplitude. Noteworthy is that the red region depicts moderate changes in amplitude of  $\sim$ 15%. This region corresponds to  $K_c$ -values greater than 4  $\mu$ M and [IP<sub>3</sub>] greater than 2  $\mu$ M. With  $K_h$  set at 2.2  $\mu$ M, this corresponds to the middle and far-right plots of  $P_{IP_3R}$  in Fig. 3. The middle subfigure

shows that with  $K_c$  greater than 4  $\mu$ M, IP<sub>3</sub>R channels would open only at Ca<sup>2+</sup> concentrations greater than the diastolic concentration of  $\sim$ 0.1  $\mu$ M. The plot also shows that IP<sub>3</sub>R channels would remain active at Ca<sup>2+</sup> greater than the systolic peak concentration of  $\sim$ 1  $\mu$ M (53). Fig. 4 B further indicates that the increase in peak amplitude is accompanied by an increase in transient duration (FDHM). However, this change may be small, particularly at IP<sub>3</sub> concentrations lower than 1  $\mu$ M. In Fig. 4 C, it can be seen that the diastolic Ca<sup>2+</sup> concentration decreases moderately ( $\sim$ 10%) in the parameter range in which the amplitude is maximized (Fig. 4 A).

Fig. 4 B shows that FDHM of the Ca<sup>2+</sup> transient increases whenever IP<sub>3</sub>R channels are active. This increase is greater with greater concentrations of IP<sub>3</sub> and with lower values of  $K_c$ . Fig. 4 C indicates that  $K_c$  and [IP<sub>3</sub>] have a similar effect on the diastolic Ca<sup>2+</sup> concentration except that the location of the red and orange cross predicts a small ( $\sim$ 10%) drop in diastolic Ca<sup>2+</sup>. In Fig. 4, A–C, there is little change when [IP<sub>3</sub>] is low and  $K_c$  is high (*bottom right corner* of each image). This is a regime in which the IP<sub>3</sub>R channels barely open in response to ECC transients. For comparison, Fig. S2 shows the same simulations as Fig. 4 at a commonly used experimental pacing frequency of 0.3 Hz, showing similar trends.

To compare our simulation results with the experimental observations summarized in Table 1, we divided the parameter space shown in Fig. 4, A–C into four regions, shown in Fig. 4 D. In the red region, amplitude and FDHM increase. In the orange region, only FDHM increases. In the green

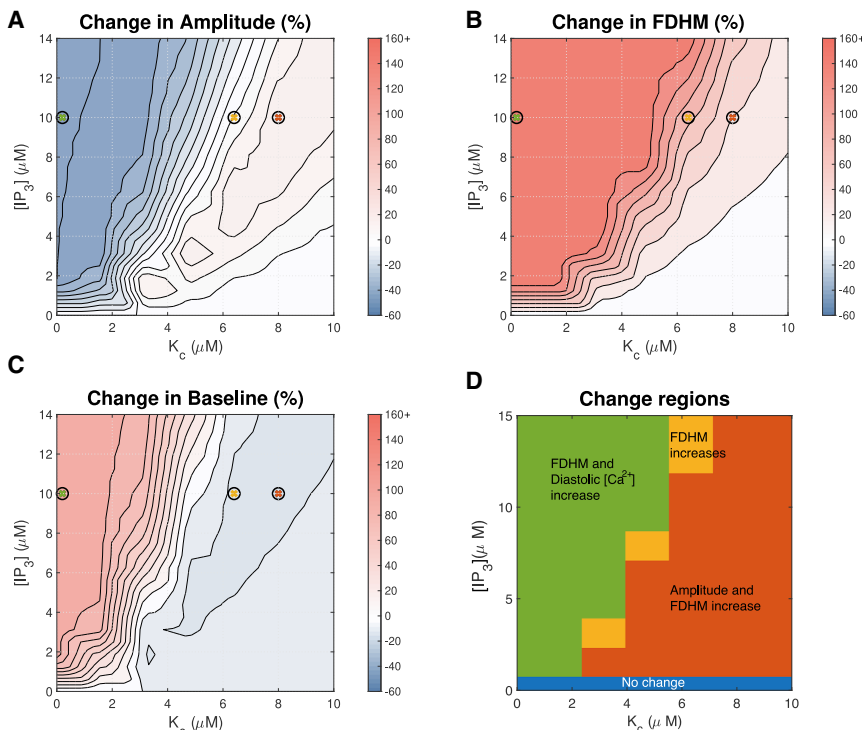

FIGURE 4 Effect of IP<sub>3</sub> concentration and the parameter  $K_c$  on the Ca<sup>2+</sup> transient with pacing frequency 1 Hz. These two parameters, along with maximal IP<sub>3</sub>R flux  $k_f$ , have the greatest impact when considering the effect of IP<sub>3</sub>R activation on the Ca<sup>2+</sup> transient. To better resolve the range in which FDHM changes, all FDHM increases of 45% and over are shown in the same color. See Fig. 5 for simulated transients at parameters indicated by crosses. We note that for ease of comparison between figures, in this and in subsequent figures, the maximal increase from baseline is cropped at 160%. Changes greater than this threshold are shown in the same color. To see this figure in color, go online.

region, FDHM and diastolic  $[Ca^{2+}]$  increase, but amplitude decreases. Comparing to the experimental observation of amplitude increase summarized in Table 1, the red region appears to describe the most plausible parameter range. Fig. 4 D also shows that there is no parameter set in which both amplitude and diastolic  $Ca^{2+}$  concentration increase. Furthermore, there is no region in which transients with increased amplitude and decreased duration are observed, as has been reported in ET-1-treated rat ventricular myocyte experiments (54). Finally, with the exception of the blue region in which there is no change, we observe that the FDHM increases in all parameter regimes.

To examine these results further, we investigated model behavior in different regions of Fig. 4 D, shown in Fig. 5 and marked as green, red, and orange crosses in Fig. 4, A–C. Comparing the green cytosolic profiles (corresponding to the green region in Fig. 4 D) and blue cytosolic  $Ca^{2+}$  profiles (corresponding to no IP<sub>3</sub>R activation) in Fig. 5, we find that IP<sub>3</sub>R opening at diastolic  $Ca^{2+}$  levels and IP<sub>3</sub>R inhibition at  $Ca^{2+}$  levels below peak transient concentrations generates a flatter  $Ca^{2+}$  transient. This is the result of a gradual depletion of SR  $Ca^{2+}$  stores from IP<sub>3</sub>R opening. This subsequently leads to lower  $Ca^{2+}$  release through RyR and IP<sub>3</sub>R channels.

Interestingly, a delayed time to peak is observed with IP<sub>3</sub>R activation in all regimes selected. With the reduction in SR load due to IP<sub>3</sub>R activation, we find reduced  $Ca^{2+}$  flux through RyRs. To maintain or increase  $Ca^{2+}$  transient amplitude after activation, the IP<sub>3</sub>R channels must compensate for the drop in RyR flux. Because the spike in IP<sub>3</sub>R flux is in response to  $Ca^{2+}$  release from RyR channels and initial RyR-mediated  $Ca^{2+}$

release is slower with lower SR  $Ca^{2+}$  stores, it delays the time between cell stimulation and  $Ca^{2+}$  transient peak.

The increase in FDHM of the transient from IP<sub>3</sub>R activation apparent in Fig. 4 B can be explained by continued release of  $Ca^{2+}$  through IP<sub>3</sub>R channels after RyRs have closed in Fig. 5. The slower release through IP<sub>3</sub>R channels after RyRs close is a result of a smaller proportion of the channels opening and a decrease in SR  $Ca^{2+}$  store load.

### Maximal flux through IP<sub>3</sub>Rs can increase signal duration

The parameter sensitivity analysis in Table 2 indicates that maximal flux through IP<sub>3</sub>Rs ( $k_f$ ) has the greatest effect on  $Ca^{2+}$  transient duration. Therefore, we next examined how increased  $k_f$ -values in our model affect the  $Ca^{2+}$  transient. Fig. 6, A–C show that for  $K_c < 2 \mu M$ , increasing  $k_f$  above  $0.45 \mu m^3 ms^{-1}$  mostly increases transient duration but has only marginal effects on amplitude and baseline. However, for large  $K_c$ , the role of  $k_f$  in modifying transient shape becomes more noticeable. There is a clear region in which amplitude increases (red region); however, this is more dependent on  $K_c$  than  $k_f$ . At 1 Hz, there is no value of  $k_f$  that reduces transient duration. With IP<sub>3</sub>R activation, the transient duration increases, and  $k_f$  merely determines by how much. However it is of note that, as shown in Fig. 7, at a lower frequency of 0.3 Hz, when  $k_f > 1.2 \mu m^3 ms^{-1}$  and  $K_c > 8 \mu M$ , there is a decrease in duration of the transient.

To compare simulation results to experimental observations in Table 1, we divided the parameter space shown in

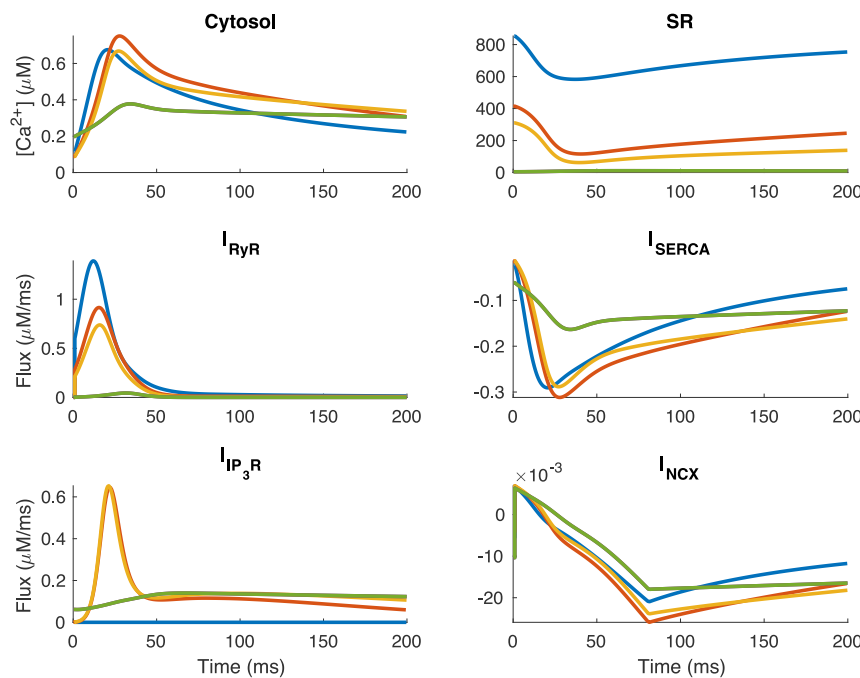

FIGURE 5 Simulated ECC transient and fluxes in the absence (blue) and presence of IP<sub>3</sub>, corresponding to low (green), medium (orange), and high (red) values of  $K_c$ . With  $K_c = 8 \mu M$  (orange), IP<sub>3</sub>R channels open only at  $Ca^{2+}$  concentrations greater than  $0.1 \mu M$ . This results in increased peak in cytosolic  $Ca^{2+}$  transients and depleted SR  $Ca^{2+}$  stores. Parameters here were selected to show absence of IP<sub>3</sub>R channels (blue), increased transient amplitude (orange, red), and IP<sub>3</sub>R parameterized as described in the original Siekmann-Cao-Sneyd model (green). IP<sub>3</sub> concentration is  $10 \mu M$  and pacing frequency 1 Hz in all simulations. The sign of  $I_{NCX}$  indicates whether  $Ca^{2+}$  is moving into (positive) or out of (negative) the cell. To see this figure in color, go online.



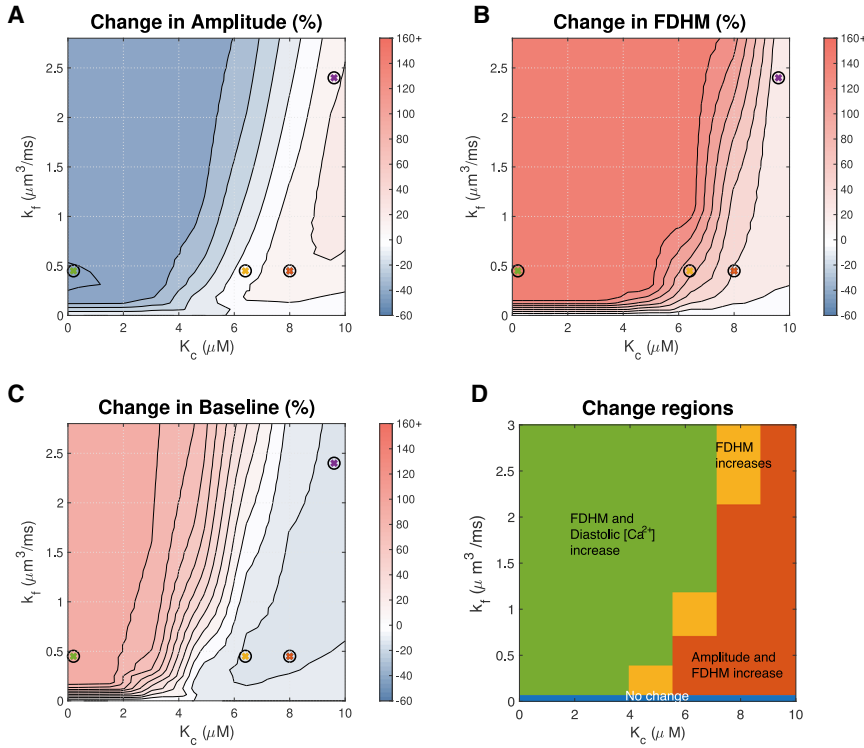

FIGURE 6 Effect of maximal IP<sub>3</sub>R flux  $k_f$  and the Ca<sup>2+</sup> sensitivity parameter  $K_c$  on the Ca<sup>2+</sup> transient at 1 Hz. Maximal IP<sub>3</sub>R flux has the greatest impact on transient duration. In these simulations, [IP<sub>3</sub>] = 10 μM. See Fig. 5 for simulated transients at parameters indicated by crosses. To see this figure in color, go online.

Fig. 6, A–C into three regions, shown in Fig. 6 D. The regions in this figure are consistent with the regions labeled in Fig. 4 D. Fig. 7 D shows similar regions corresponding to simulations at 0.3 Hz. It can be seen that at 0.3 Hz,

$K_c > 8 \mu\text{M}$  and  $k_f > 1.2 \mu\text{m}^3 \text{ms}^{-1}$  provide transients with increased amplitude and decreased duration, consistent with the rat ET-1 experiments summarized in Table 1. However, this value of  $k_f$  results in an unrealistic flux

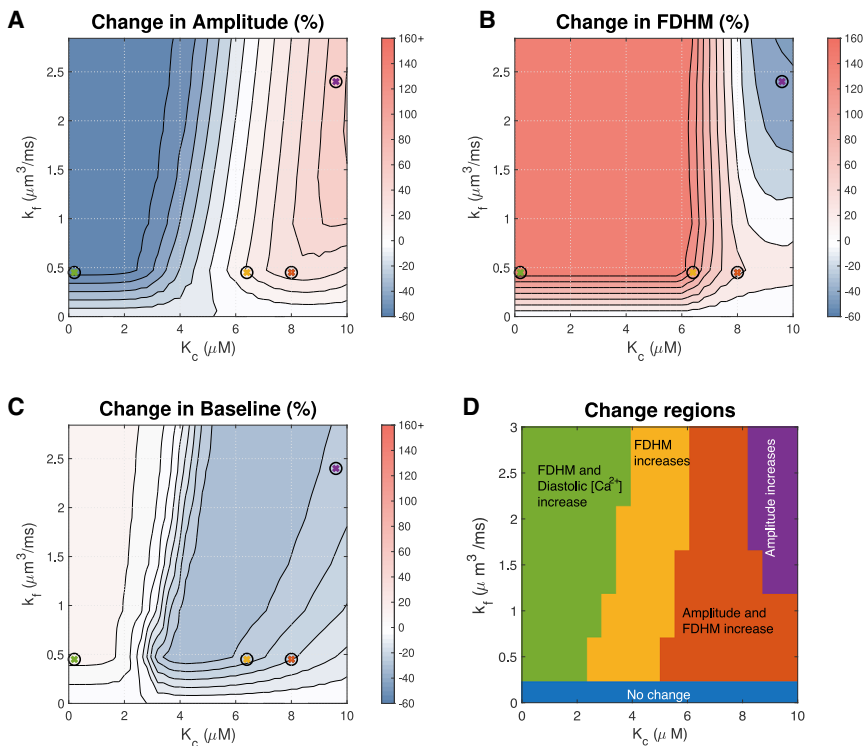

FIGURE 7 Effect of maximal IP<sub>3</sub>R flux  $k_f$  and the Ca<sup>2+</sup> sensitivity parameter  $K_c$  on the Ca<sup>2+</sup> transient at 0.3 Hz. Maximal IP<sub>3</sub>R flux has the greatest impact on transient duration. In these simulations, [IP<sub>3</sub>] = 10 μM. See Fig. S3 for simulated transients at parameter values indicated by crosses. To see this figure in color, go online.

through IP<sub>3</sub>R channels. Additionally, *in vivo*, the cell would be paced at a faster frequency, and this result is unlikely without the cell being able to return to resting Ca<sup>2+</sup>. We have not been able to identify a parameter set that would provide a simultaneous increase in both amplitude and diastolic Ca<sup>2+</sup>.

### RyR and IP<sub>3</sub>R interaction increases the intracellular Ca<sup>2+</sup> duty cycle

Having established reasonable parameter ranges for IP<sub>3</sub>R activation based on the influence on ECC Ca<sup>2+</sup> transient properties (amplitude, FDHM, and diastolic Ca<sup>2+</sup>), we investigated the possibility that cytosolic Ca<sup>2+</sup> plays a role in hypertrophic remodeling through changing the duty cycle. Given the timescale involved in hypertrophic remodeling and the signal integration properties of NFAT, the IP<sub>3</sub>R-modified cytosolic Ca<sup>2+</sup> transient could cumulatively encode hypertrophic signaling. Using optogenetic encoding of cytosolic Ca<sup>2+</sup> transients in HeLa cells, Hannanta-anan and Chow (8) demonstrated that the transcriptional activity of NFAT4 can be upregulated by increasing the cytosolic Ca<sup>2+</sup> duty cycle. This is a plausible mechanism of signal encoding that is likely to be less susceptible to noise than either amplitude or frequency encoding. Therefore, we examined the cytosolic Ca<sup>2+</sup> duty cycle as a hypertrophic signaling mechanism.

We calculated the duty cycle for the Ca<sup>2+</sup> transients in the plausible parameter ranges for IP<sub>3</sub>R activation as the ratio

between the area under the Ca<sup>2+</sup> transient curve and the area of the bounded box defined by the amplitude and period of the Ca<sup>2+</sup> transient (shown in Fig. 2). Fig. 8 shows the effects of [IP<sub>3</sub>],  $k_f$ , and  $K_c$  on the duty cycle of the cytosolic Ca<sup>2+</sup> transient. The figure shows that the Ca<sup>2+</sup> duty cycle increases with IP<sub>3</sub>R activation across the broad parameter range shown.

### NFAT activation increases with an increase in calcium duty cycle

Having established that IP<sub>3</sub>R activation results in increased calcium transient duty cycle, we coupled the model of cytosolic ARVM calcium dynamics to the model of NFAT activation developed by Cooling et al. (50). We then tested the effect of varying IP<sub>3</sub> concentration over a range of IP<sub>3</sub>R parameter values on the proportion of dephosphorylated nuclear NFAT compared with that in the phosphorylated inactive state in the cytosol (Fig. 9). These simulation data clearly show that increased IP<sub>3</sub> and alteration in the Ca<sup>2+</sup> transient duty cycle positively influence NFAT activation and thus provides a mechanism to couple IP<sub>3</sub>-induced Ca<sup>2+</sup> release and activation of hypertrophic gene expression.

### DISCUSSION

Here, we have presented what is, to our knowledge, the first modeling study to investigate the effect of IP<sub>3</sub>R channel activity on the cardiac ECC Ca<sup>2+</sup> transient and possible

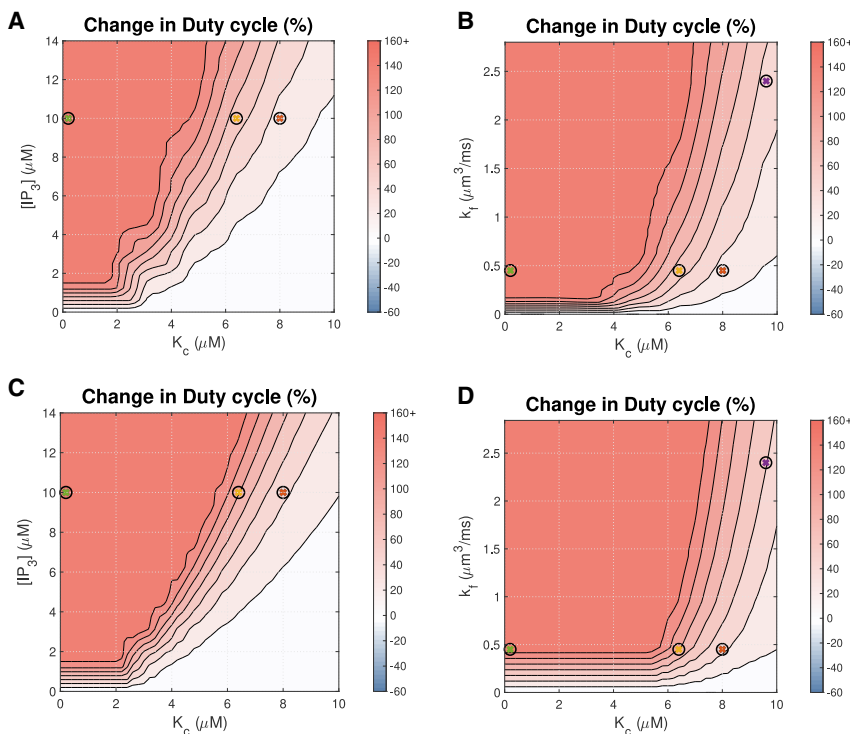

FIGURE 8 Effects on the Ca<sup>2+</sup> transient duty cycle of (A) IP<sub>3</sub> concentration and the Ca<sup>2+</sup> sensitivity parameter  $K_c$  with pacing frequency 1 Hz, (B) maximal IP<sub>3</sub>R flux  $k_f$  and  $K_c$  with pacing frequency 1 Hz, (C) IP<sub>3</sub> concentration and  $K_c$  with pacing frequency 0.3 Hz, and (D) maximal IP<sub>3</sub>R flux  $k_f$  and  $K_c$  at pacing frequency 0.3 Hz. The color bar indicates the percent change from a simulation run with identical parameters but no IP<sub>3</sub>R channels. The colored crosses indicate the parameters used for the corresponding plots in Fig. 5. Hannanta-anan and Chow (8) report a transcription rate increase of ~30% with a duty cycle increase of 50% in Fig. 2 of their work. The duty cycle of the Ca<sup>2+</sup> transient when IP<sub>3</sub>Rs are inactive is 0.127. To see this figure in color, go online.

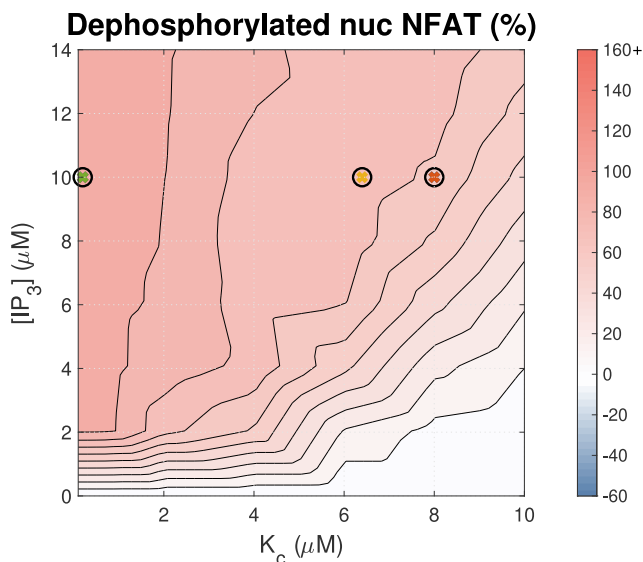

FIGURE 9 Effect of  $[IP_3]$  and  $K_c$  on the concentration of dephosphorylated nuclear NFAT ( $NFAT_n$ ). Simulations were paced at 1 Hz. The color bar indicates the percent change from a simulation run with identical parameters but no  $IP_3$ . To see this figure in color, go online.

information encoding mechanisms. We extended a well-established model of the ECC  $Ca^{2+}$  transient by Hinch et al. (14) to include a model of  $IP_3R$  activation and  $Ca^{2+}$  release. The model, upon  $IP_3R$  activation, simulates the influence of  $IP_3R$  activation on  $Ca^{2+}$  transients in nonhypertrophic adult rat left ventricular cardiac myocytes.

Parameter sensitivity analysis (Table 2) showed the maximal  $IP_3$ -induced  $Ca^{2+}$  release through individual  $IP_3R$  ( $k_f$ ) had the greatest influence on the  $Ca^{2+}$  transient duration and duty cycle.  $[IP_3]$  had the biggest influence on the  $Ca^{2+}$  amplitude and diastolic  $Ca^{2+}$  concentration. We found that under fixed maximal  $IP_3R$  flux,  $k_f = 0.45 \mu\text{m}^3 \text{ms}^{-1}$ ,  $IP_3R$  activation increases the duration of the  $Ca^{2+}$  transient, but  $Ca^{2+}$  amplitude is  $IP_3$  dependent. The  $Ca^{2+}$  transient duration can be reduced only by increasing  $k_f$  to physiologically unrealistic values.

The finding that the  $Ca^{2+}$  transient duty cycle increases with  $[IP_3]$  (see Fig. 8) provides a plausible explanation for the mechanism by which  $IP_3$ -dependent  $Ca^{2+}$  release from  $IP_3Rs$  can enhance pro-hypertrophic NFAT activity.

### Does $IP_3$ -induced $Ca^{2+}$ release modify the ECC transient?

Figs. 4, 6 and 7 show that  $IP_3Rs$  can influence the ECC  $Ca^{2+}$  transient and that the effect is dependent on the  $IP_3R$  properties and  $IP_3$  concentration. Our model simulations predict that  $Ca^{2+}$  transient amplitude increases  $\sim 15\%$  when  $IP_3R$  properties are such that  $IP_3Rs$  remain inhibited from opening at diastolic  $Ca^{2+}$  but release  $Ca^{2+}$  once RyRs are activated and remain open when  $Ca^{2+}$  concentration is above  $1 \mu\text{M}$ . The  $IP_3R$  parameter combination marked by a red

cross in the contour plots is a representative example of this type of effect of  $IP_3Rs$ . There is also a narrow parameter range at  $[IP_3]$  of  $10 \mu\text{M}$  ( $K_h = 2.2 \mu\text{M}$ ,  $K_c = 6 \mu\text{M}$ ) in which the amplitude does not change more than 5% (see Fig. 4). The orange cross marks an example of  $IP_3R$  effects in this parameter range. These simulation predictions are consistent with the experimental studies that either show increased amplitude or no change in amplitude (Table 1).

Model simulations predict that  $IP_3R$  activation only increases diastolic  $[Ca^{2+}]$  when  $IP_3Rs$  are open at resting  $[Ca^{2+}]$  of  $\sim 0.1 \mu\text{M}$  (see Fig. 4 D). Harzheim et al. (17) reported no measurable differences in diastolic  $[Ca^{2+}]$  between ARVMs stimulated with an agonist known to induce hypertrophy in healthy ARVMs and those treated with a saline buffer (although effects have been observed in disease ventricular cardiomyocytes and atrial cardiomyocytes). Examination of simulated  $Ca^{2+}$  transients within a regime that results in diastolic  $[Ca^{2+}]$  increase (green traces in Fig. 5) shows that the transients do not resemble any of the observed experimental measurements in the literature. Therefore, the comparison of model simulations and experimental measurements of diastolic  $[Ca^{2+}]$  and  $Ca^{2+}$  transient amplitude suggest that the most likely regime of  $IP_3R$  activation lies between the orange and red regions in Fig. 4 D. Using these comparisons, we propose that  $IP_3R$  activation makes modest changes to the ECC  $Ca^{2+}$  transient that are often hidden within the measurement variability in experiments.

### The biological significance of the duty cycle

We showed that although amplitude, duration, and diastolic  $Ca^{2+}$  can increase or decrease depending on  $IP_3R$  parameter values and pacing frequency, the duty cycle, as defined by Hannanta-anan and Chow (8), always increases with  $IP_3$ , consistent with effects seen in (21). The implication of this observation is that  $IP_3R$  activation is sufficient to provide a signal to drive NFAT nuclear translocation and hence hypertrophic gene expression in the manner described by Hannanta-anan and Chow (8).

Hannanta-anan and Chow (8) found that when comparing  $Ca^{2+}$  oscillations of the same amplitude, oscillations with greater duty cycle had a greater effect on NFAT dephosphorylation and translocation to the nucleus. In their study, duty cycle,  $\gamma$ , was calculated as the area under the curve,  $U$ , divided by the maximal area under the curve (for  $Ca^{2+}$  oscillations of the same amplitude,  $A$ , and period of oscillation,  $T$ ), i.e.,  $\gamma = U/AT$  (see Fig. 2 A). An alternative definition is  $\gamma = \Delta/T$ , where  $\Delta$  is the transient duration and  $T$  the period of oscillation. This alternate formulation is used by Tomida et al. (37) and Salazar et al. (55) but is less well defined for analog signals. The duty cycle in Fig. 8 was calculated using the former definition. This can be compared with the latter definition when remembering that duty cycle will now vary with FDHM (Figs. 4 C and 6 C).

The duty cycle in this system essentially reflects the fraction of each period of the Ca<sup>2+</sup> cycle for which cytosolic Ca<sup>2+</sup> is sufficiently elevated to affect the downstream proteins in the CnA/NFAT signaling pathway. The greater sensitivity of NFAT to Ca<sup>2+</sup> oscillations with sustained elevation in intracellular Ca<sup>2+</sup> is well established (19,38,56). Although it is difficult to determine where this threshold is, NFAT is a Ca<sup>2+</sup> integrator, and a clear correlation has been found between Ca<sup>2+</sup> duty cycle and NFAT activation (8). Increasing duty cycle increases the time NFAT spends in the dephosphorylated state, which is required to both enter and maintain it in the nucleus and hence affects transcription (57); NFAT responds to changes in duty cycle while being insensitive to both amplitude and frequency changes. We see in simulations too that the proportion of NFAT that is in the dephosphorylated nuclear state is highest when the duty cycle of the Ca<sup>2+</sup> transient is high (Figs. 8 and 9).

In experiments, IP<sub>3</sub> stimulation has been shown to lead to an increase in systolic Ca<sup>2+</sup> in cardiac cells, but a significant change in duration has not been reported (although as in Harzheim et al. (17) and Proven et al. (21), increased spontaneous calcium transients are observed that could function to prolong the duration of the Ca<sup>2+</sup> transient). Based on the definition of the duty cycle presented in Hannanta-anan and Chow (8), there is a negative effect on duty cycle, and hence NFAT activation, when Ca<sup>2+</sup> transient amplitude is increased. However, within the physiologically plausible parameter range, we find that simulations with increased Ca<sup>2+</sup> transient amplitude also have increased transient duration. We postulate that NFAT may be responsive to the Ca<sup>2+</sup> transient through the latter definition of the duty cycle—i.e., the duration of time that Ca<sup>2+</sup> is elevated over a threshold divided by the period. This is more consistent with both the biological mechanism and the potential increase in peak Ca<sup>2+</sup> concentration in the hypertrophic pathway, which may be a side effect of a corresponding increase in duration over this threshold. Further research, both theoretical and experimental, is required to determine the validity of this assumption.

Fig. 9 shows a strong correlation between [Ca<sup>2+</sup>]-dependent NFAT activation and Ca<sup>2+</sup> transient duty cycle in the Cooling et al. (50) model; the correspondence between Figs. 8 A and 9 is striking. A caveat, however, is that the original Cooling et al. (50) study showed that the NFAT model is also sensitive to any average increase in cytosolic calcium. Therefore, although increasing Ca<sup>2+</sup> transient duty cycle is shown to be sufficient for NFAT activation in this model, further experimental validation is required to confirm this mechanism in cardiomyocytes.

### Experimental evidence of an IP<sub>3</sub>-induced increase in calcium duty cycle?

An increase in duty cycle without an increase in frequency requires an increase in transient duration. Although this in-

crease is observed in our simulations for a broad range of parameter values, it has not, however, been reported in experiments involving IP<sub>3</sub> stimulation. The possible reasons for this are many and varied; however, as discussed earlier, using different IP<sub>3</sub> concentrations to those that occur in vivo may result in different effects on the shape of the Ca<sup>2+</sup> oscillations, leading to inconsistent observations. Furthermore, small variations in Ca<sup>2+</sup> concentrations may not be experimentally discernible or may be hidden by the effect of Ca<sup>2+</sup>-sensitive dyes (58). A small but prolonged variation in transient duration can produce a comparatively large change in duty cycle. Hence, it remains to be confirmed experimentally whether IP<sub>3</sub>R-dependent Ca<sup>2+</sup> flux does indeed lead to an increased Ca<sup>2+</sup> duty cycle in cardiomyocytes.

### Limitations of study

In this study, we have considered generation of voltage-driven cytosolic Ca<sup>2+</sup> transients using deterministic models of each ion channel in a compartmental model. There are several physiological features of cardiomyocyte Ca<sup>2+</sup> dynamics that are not represented and hence not considered in this approach. In particular, our model does not represent any of the stochastic events associated with IP<sub>3</sub>R channels. Further modeling of combined stochastic channel gating may be necessary to elucidate the entire impact of IP<sub>3</sub>R interaction with the cytosolic Ca<sup>2+</sup> machinery. Although cell structure is known to play a role in cardiac Ca<sup>2+</sup> dynamics (59–61), effects beyond the synchronizing function of the dyad are not considered in this compartmental study. Furthermore, we have not considered the spatial IP<sub>3</sub>R distribution. Our model is developed primarily using parameters fitted by (14) and (32) and makes no distinction between IP<sub>3</sub>R channels located within or outside the dyad (62,63). These and other structural features of the cell could alter the Ca<sup>2+</sup> available to regulate IP<sub>3</sub>R channels and may be detected in the Ca<sup>2+</sup> transient. Distinct effects of IP<sub>3</sub> signaling in the cytosol and the nucleus are also not considered. Cytosolic Ca<sup>2+</sup> is thought to promote translocation of NFAT into the nucleus, whereas nuclear Ca<sup>2+</sup> maintains it there (16). We have only investigated the former role for Ca<sup>2+</sup> signaling within the CnA/NFAT pathway.

We have explored model behavior at pacing frequencies of 1 and 0.3 Hz rather than higher, more physiological frequencies, primarily because the majority of parameters were derived from in vitro experiments conducted at room temperature. Extrapolation of parameters, and hence model behavior, to in vivo temperature and correspondingly higher pacing frequency remains challenging. Therefore, model predictions must be interpreted cautiously in relation to higher pacing frequencies.

Additionally, not all components of this signaling pathway have been considered in this study. Ca<sup>2+</sup>/

calmodulin-dependent kinases II and Class IIa histone deacetylases, for example, are both known  $\text{Ca}^{2+}$ -mediated components of the hypertrophic pathway that are activated by  $\text{IP}_3$  signaling (64) but are not included. Here, we have focused only on the impact of  $\text{IP}_3\text{R}$  activation on the cytosolic  $\text{Ca}^{2+}$  dynamics and how this relates to the mechanism of NFAT activation. To explore broader context for  $\text{IP}_3$ -mediated hypertrophic signaling, it remains to couple this model to upstream events, including models of  $\text{IP}_3$  production through activation of cell membrane receptors (65,66). This would allow the profile and extent of the rise in  $\text{IP}_3$  concentration due to the activation of the hypertrophic pathway in cardiomyocytes to be determined. We have focused on the effect of an elevated  $\text{IP}_3$  concentration of  $10\ \mu\text{M}$  because many experimental studies on the effect of  $\text{IP}_3$  on  $\text{Ca}^{2+}$  dynamics use saturating  $[\text{IP}_3]$ . However, Remus et al. (67) found stimulation of adult cat ventricular myocytes with  $100\ \text{nM}$  ET-1 induced a cell-averaged increase in  $\text{IP}_3$  concentration of only  $10\ \text{nM}$ , indicating a much lower concentration than used in experiments. This, together with known differences between species, suggests the  $\text{IP}_3$  concentration detected by  $\text{IP}_3\text{R}$  receptors in ARVMs in vivo could be lower than the simulated  $10\ \mu\text{M}$ . However, we note qualitatively similar effects on the  $\text{Ca}^{2+}$  transient in parameter regimes with lower  $[\text{IP}_3]$  in our model (Figs. 4 and S2), albeit with more modest effects on the transient shape. Additionally, ET-1 receptors are localized to t-tubule membranes (68), so  $\text{IP}_3$  may be generated very close to  $\text{IP}_3\text{R}$  channels (63,69), increasing the concentration they detect.

Finally,  $\text{IP}_3\text{R}$ -induced  $\text{Ca}^{2+}$  release is a part of a larger hypertrophic signaling network. It remains to couple this model to other signaling pathways involved in bringing about hypertrophic remodeling (70). How cytosolic  $\text{Ca}^{2+}$  interacts with nuclear  $\text{Ca}^{2+}$  in regulation of NFAT nuclear residence and activity also remains to be determined.

## CONCLUSIONS

The sensitivity of NFAT translocation to the  $\text{Ca}^{2+}$  duty cycle demonstrated by Hannanta-anan and Chow (8) raises the question as to whether  $\text{IP}_3\text{R}$  flux can increase the  $\text{Ca}^{2+}$  duty cycle in cardiomyocytes during hypertrophic signaling. Here, we have shown, using mathematical modeling, that an increase in cytosolic  $\text{Ca}^{2+}$  transient duration can occur after addition of  $\text{IP}_3$ , and furthermore, that this increase is sufficient to increase NFAT activation. Together, these results suggest a plausible mechanism for hypertrophic signaling via  $\text{IP}_3\text{R}$  activation in cardiomyocytes. Although it cannot be ruled out that a significant role is played by components of this pathway that are not considered here, the computational evidence provided in this study, along with the previous experimental findings, suggests encoding of the hypertrophic signal through alteration of the duration of cytosolic  $\text{Ca}^{2+}$  oscillations to be a feasible mechanism for  $\text{IP}_3$ -dependent hypertrophic signaling.

## SUPPORTING MATERIAL

Supporting Material can be found online at <https://doi.org/10.1016/j.bpj.2020.08.001>.

## AUTHOR CONTRIBUTIONS

E.J.C., V.R., H.L.R., C.S., and G.B. conceived of the study. E.J.C. and V.R. supervised the project. H.H., A.T., V.R., and E.J.C. developed the modeling approach. H.H. implemented the simulations. H.L.R., C.S., and G.B. provided critical feedback. All authors contributed to writing the manuscript.

## ACKNOWLEDGMENTS

This research was supported in part by the Australian Government through the Australian Research Council Discovery Projects funding scheme (project DP170101358). H.L.R. wishes to acknowledge financial support from the Research Foundation Flanders through project grant G08861N and Odysseus programme grant 90663.

## SUPPORTING CITATIONS

References (71,72) appear in the Supporting Material.

## REFERENCES

- Berridge, M. J., M. D. Bootman, and H. L. Roderick. 2003. Calcium signalling: dynamics, homeostasis and remodelling. *Nat. Rev. Mol. Cell Biol.* 4:517–529.
- Clapham, D. E. 2007. Calcium signaling. *Cell.* 131:1047–1058.
- Berridge, M. J. 1997. The AM and FM of calcium signalling. *Nature.* 386:759–760.
- Berridge, M. J. 2006. Calcium microdomains: organization and function. *Cell Calcium.* 40:405–412.
- Bootman, M. D., C. Fearnley, ..., H. L. Roderick. 2009. An update on nuclear calcium signalling. *J. Cell Sci.* 122:2337–2350.
- Purvis, J. E., and G. Lahav. 2013. Encoding and decoding cellular information through signaling dynamics. *Cell.* 152:945–956.
- Uzhachenko, R., A. Shanker, and G. Dupont. 2016. Computational properties of mitochondria in T cell activation and fate. *Open Biol.* 6:160192.
- Hannanta-Anan, P., and B. Y. Chow. 2016. Optogenetic control of calcium oscillation waveform defines NFAT as an integrator of calcium load. *Cell Syst.* 2:283–288.
- Roderick, H. L., D. R. Higazi, ..., M. D. Bootman. 2007. Calcium in the heart: when it's good, it's very very good, but when it's bad, it's horrid. *Biochem. Soc. Trans.* 35:957–961.
- Hohendanner, F., J. T. Maxwell, and L. A. Blatter. 2015. Cytosolic and nuclear calcium signaling in atrial myocytes:  $\text{IP}_3$ -mediated calcium release and the role of mitochondria. *Channels (Austin).* 9:129–138.
- Zinn, M., S. West, and B. Kuhn. 2018. Mechanisms of cardiac hypertrophy. In *Heart Failure in the Child and Young Adult*. J. L. Jefferies, A. C. Chang, J. W. Rossano, R. E. Shaddy, and J. A. Towbin, eds. Academic Press, pp. 51–58.
- Tham, Y. K., B. C. Bernardo, ..., J. R. McMullen. 2015. Pathophysiology of cardiac hypertrophy and heart failure: signaling pathways and novel therapeutic targets. *Arch. Toxicol.* 89:1401–1438.
- Gilbert, G., K. Demydenko, ..., H. L. Roderick. 2020. Calcium signaling in cardiomyocyte function. *Cold Spring Harb. Perspect. Biol.* 12:035428.
- Hinch, R., J. L. Greenstein, ..., R. L. Winslow. 2004. A simplified local control model of calcium-induced calcium release in cardiac ventricular myocytes. *Biophys. J.* 87:3723–3736.

15. Vierheller, J., W. Neubert, ..., N. Chamakuri. 2015. A multiscale computational model of spatially resolved calcium cycling in cardiac myocytes: from detailed cleft dynamics to the whole cell concentration profiles. *Front. Physiol.* 6:255.
16. Higazi, D. R., C. J. Fearnley, ..., H. L. Roderick. 2009. Endothelin-1-stimulated InsP3-induced Ca<sup>2+</sup> release is a nexus for hypertrophic signaling in cardiac myocytes. *Mol. Cell.* 33:472–482.
17. Harzheim, D., M. Movassagh, ..., H. L. Roderick. 2009. Increased InsP3Rs in the junctional sarcoplasmic reticulum augment Ca<sup>2+</sup> transients and arrhythmias associated with cardiac hypertrophy. *Proc. Natl. Acad. Sci. USA.* 106:11406–11411.
18. Nakayama, H., I. Bodi, ..., J. D. Molkentin. 2010. The IP3 receptor regulates cardiac hypertrophy in response to select stimuli. *Circ. Res.* 107:659–666.
19. Rinne, A., N. Kapur, ..., L. A. Blatter. 2010. Isoform- and tissue-specific regulation of the Ca(2+)-sensitive transcription factor NFAT in cardiac myocytes and heart failure. *Am. J. Physiol. Heart Circ. Physiol.* 298:H2001–H2009.
20. Signore, S., A. Sorrentino, ..., M. Rota. 2013. Inositol 1, 4, 5-trisphosphate receptors and human left ventricular myocytes. *Circulation.* 128:1286–1297.
21. Proven, A., H. L. Roderick, ..., M. D. Bootman. 2006. Inositol 1,4,5-trisphosphate supports the arrhythmogenic action of endothelin-1 on ventricular cardiac myocytes. *J. Cell Sci.* 119:3363–3375.
22. Domeier, T. L., A. V. Zima, ..., L. A. Blatter. 2008. IP3 receptor-dependent Ca<sup>2+</sup> release modulates excitation-contraction coupling in rabbit ventricular myocytes. *Am. J. Physiol. Heart Circ. Physiol.* 294:H596–H604.
23. Ljubojevic, S., S. Radulovic, ..., B. Pieske. 2014. Early remodeling of perinuclear Ca<sup>2+</sup> stores and nucleoplasmic Ca<sup>2+</sup> signaling during the development of hypertrophy and heart failure. *Circulation.* 130:244–255.
24. Olivares-Florez, S., M. Czolbe, ..., O. Ritter. 2018. Nuclear calcineurin is a sensor for detecting Ca<sup>2+</sup> release from the nuclear envelope via IP<sub>3</sub>R. *J. Mol. Med. (Berl).* 96:1239–1249.
25. Smyrnias, I., N. Goodwin, ..., H. L. Roderick. 2018. Contractile responses to endothelin-1 are regulated by PKC phosphorylation of cardiac myosin binding protein-C in rat ventricular myocytes. *J. Mol. Cell. Cardiol.* 117:1–18.
26. Harzheim, D., A. Talasila, ..., H. L. Roderick. 2010. Elevated InsP3R expression underlies enhanced calcium fluxes and spontaneous extrasystolic calcium release events in hypertrophic cardiac myocytes. *Channels (Austin).* 4:67–71.
27. Foskett, J. K., C. White, ..., D.-O. D. Mak. 2007. Inositol trisphosphate receptor Ca<sup>2+</sup> release channels. *Physiol. Rev.* 87:593–658.
28. Ramos-Franco, J., D. Bare, ..., G. Mignery. 2000. Single-channel function of recombinant type 2 inositol 1,4, 5-trisphosphate receptor. *Biophys. J.* 79:1388–1399.
29. Siekmann, I., J. Sneyd, and E. J. Crampin. 2014. Statistical analysis of modal gating in ion channels. *Proc. R. Soc. A Math. Phys. Eng. Sci.* 470:20140030.
30. Siekmann, I., P. Cao, ..., E. J. Crampin. 2019. Data-driven modelling of the inositol trisphosphate receptor (IP<sub>3</sub>R) and its role in calcium-induced calcium release (CICR). In *Computational Glioscience*. M. De Pittá and H. Berry, eds. Springer International Publishing, pp. 39–68.
31. Cao, P., X. Tan, ..., J. Sneyd. 2014. A deterministic model predicts the properties of stochastic calcium oscillations in airway smooth muscle cells. *PLoS Comput. Biol.* 10:e1003783.
32. Sneyd, J., J. M. Han, ..., D. I. Yule. 2017. On the dynamical structure of calcium oscillations. *Proc. Natl. Acad. Sci. USA.* 114:1456–1461.
33. Siekmann, I., J. Sneyd, and E. J. Crampin. 2012. MCMC can detect nonidentifiable models. *Biophys. J.* 103:2275–2286.
34. Terkildsen, J. R., S. Niederer, ..., N. P. Smith. 2008. Using Physiome standards to couple cellular functions for rat cardiac excitation-contraction. *Exp. Physiol.* 93:919–929.
35. Wilkins, B. J., L. J. De Windt, ..., J. D. Molkentin. 2002. Targeted disruption of NFATc3, but not NFATc4, reveals an intrinsic defect in calcineurin-mediated cardiac hypertrophic growth. *Mol. Cell. Biol.* 22:7603–7613.
36. Molkentin, J. D., J. R. Lu, ..., E. N. Olson. 1998. A calcineurin-dependent transcriptional pathway for cardiac hypertrophy. *Cell.* 93:215–228.
37. Tomida, T., K. Hirose, ..., M. Iino. 2003. NFAT functions as a working memory of Ca<sup>2+</sup> signals in decoding Ca<sup>2+</sup> oscillation. *EMBO J.* 22:3825–3832.
38. Colella, M., F. Grisan, ..., T. Pozzan. 2008. Ca<sup>2+</sup> oscillation frequency decoding in cardiac cell hypertrophy: role of calcineurin/NFAT as Ca<sup>2+</sup> signal integrators. *Proc. Natl. Acad. Sci. USA.* 105:2859–2864.
39. Saucerman, J. J., and D. M. Bers. 2008. Calmodulin mediates differential sensitivity of CaMKII and calcineurin to local Ca<sup>2+</sup> in cardiac myocytes. *Biophys. J.* 95:4597–4612.
40. Ulrich, J. D., M.-S. Kim, ..., Y. M. Usachev. 2012. Distinct activation properties of the nuclear factor of activated T-cells (NFAT) isoforms NFATc3 and NFATc4 in neurons. *J. Biol. Chem.* 287:37594–37609.
41. Yissachar, N., T. Sharar Fischler, ..., N. Friedman. 2013. Dynamic response diversity of NFAT isoforms in individual living cells. *Mol. Cell.* 49:322–330.
42. Kar, P., G. R. Mirams, ..., A. B. Parekh. 2016. Control of NFAT isoform activation and NFAT-dependent gene expression through two coincident and spatially segregated intracellular Ca<sup>2+</sup> signals. *Mol. Cell.* 64:746–759.
43. Pandit, S. V., W. R. Giles, and S. S. Demir. 2003. A mathematical model of the electrophysiological alterations in rat ventricular myocytes in type-I diabetes. *Biophys. J.* 84:832–841.
44. Wagner, J., and J. Keizer. 1994. Effects of rapid buffers on Ca<sup>2+</sup> diffusion and Ca<sup>2+</sup> oscillations. *Biophys. J.* 67:447–456.
45. Moschella, M. C., and A. R. Marks. 1993. Inositol 1,4,5-trisphosphate receptor expression in cardiac myocytes. *J. Cell Biol.* 120:1137–1146.
46. Siekmann, I., L. E. Wagner, II, ..., J. Sneyd. 2012. A kinetic model for type I and II IP<sub>3</sub>R accounting for mode changes. *Biophys. J.* 103:658–668.
47. Ramos-Franco, J., M. Fill, and G. A. Mignery. 1998. Isoform-specific function of single inositol 1,4,5-trisphosphate receptor channels. *Biophys. J.* 75:834–839.
48. Zima, A. V., E. Bovo, ..., L. A. Blatter. 2010. Ca<sup>2+</sup> spark-dependent and -independent sarcoplasmic reticulum Ca<sup>2+</sup> leak in normal and failing rabbit ventricular myocytes. *J. Physiol.* 588:4743–4757.
49. Blanch I Salvador, J., and M. Egger. 2018. Obstruction of ventricular Ca<sup>2+</sup>-dependent arrhythmogenicity by inositol 1,4,5-trisphosphate-triggered sarcoplasmic reticulum Ca<sup>2+</sup> release. *J. Physiol.* 596:4323–4340.
50. Cooling, M. T., P. Hunter, and E. J. Crampin. 2009. Sensitivity of NFAT cycling to cytosolic calcium concentration: implications for hypertrophic signals in cardiac myocytes. *Biophys. J.* 96:2095–2104.
51. Jansen, M. J. W. 1999. Analysis of variance designs for model output. *Comput. Phys. Commun.* 117:35–43.
52. Saltelli, A., P. Annoni, ..., S. Tarantola. 2010. Variance based sensitivity analysis of model output. Design and estimator for the total sensitivity index. *Comput. Phys. Commun.* 181:259–270.
53. Greenstein, J. L., and R. L. Winslow. 2002. An integrative model of the cardiac ventricular myocyte incorporating local control of Ca<sup>2+</sup> release. *Biophys. J.* 83:2918–2945.
54. Moravec, C. S., E. E. Reynolds, ..., M. Bond. 1989. Endothelin is a positive inotropic agent in human and rat heart in vitro. *Biochem. Biophys. Res. Commun.* 159:14–18.
55. Salazar, C., A. Z. Politi, and T. Höfer. 2008. Decoding of calcium oscillations by phosphorylation cycles: analytic results. *Biophys. J.* 94:1203–1215.
56. Dolmetsch, R. E., R. S. Lewis, ..., J. I. Healy. 1997. Differential activation of transcription factors induced by Ca<sup>2+</sup> response amplitude and duration. *Nature.* 386:855–858.

57. Feske, S., R. Draeger, ..., A. Rao. 2000. The duration of nuclear residence of NFAT determines the pattern of cytokine expression in human SCID T cells. *J. Immunol.* 165:297–305.
58. Sparrow, A. J., K. Sievert, ..., M. J. Daniels. 2019. Measurement of myofilament-localized calcium dynamics in adult cardiomyocytes and the effect of hypertrophic cardiomyopathy mutations. *Circ. Res.* 124:1228–1239.
59. Gaur, N., and Y. Rudy. 2011. Multiscale modeling of calcium cycling in cardiac ventricular myocyte: macroscopic consequences of microscopic dyadic function. *Biophys. J.* 100:2904–2912.
60. Rajagopal, V., G. Bass, ..., C. Soeller. 2015. Examination of the effects of heterogeneous organization of RYR clusters, myofibrils and mitochondria on Ca<sup>2+</sup> release patterns in cardiomyocytes. *PLoS Comput. Biol.* 11:e1004417–e1004431.
61. Ladd, D., A. Tilūnaitė, ..., V. Rajagopal. 2019. Assessing cardiomyocyte excitation-contraction coupling site detection from live cell imaging using a structurally-realistic computational model of calcium release. *Front. Physiol.* 10:1263.
62. Mohler, P. J., J.-J. Schott, ..., V. Bennett. 2003. Ankyrin-B mutation causes type 4 long-QT cardiac arrhythmia and sudden cardiac death. *Nature.* 421:634–639.
63. Mohler, P. J., J. Q. Davis, and V. Bennett. 2005. Ankyrin-B coordinates the Na/K ATPase, Na/Ca exchanger, and InsP3 receptor in a cardiac T-tubule/SR microdomain. *PLoS Biol.* 3:e423.
64. Wu, X., T. Zhang, ..., D. M. Bers. 2006. Local InsP3-dependent perinuclear Ca<sup>2+</sup> signaling in cardiac myocyte excitation-transcription coupling. *J. Clin. Invest.* 116:675–682.
65. Cooling, M., P. Hunter, and E. J. Crampin. 2007. Modeling hypertrophic IP3 transients in the cardiac myocyte. *Biophys. J.* 93:3421–3433.
66. Cooling, M. T., P. J. Hunter, and E. J. Crampin. 2008. Modelling biological modularity with CellML. *IET Syst. Biol.* 2:73–79.
67. Remus, T. P., A. V. Zima, ..., G. A. Mignery. 2006. Biosensors to measure inositol 1,4,5-trisphosphate concentration in living cells with spatiotemporal resolution. *J. Biol. Chem.* 281:608–616.
68. Boivin, B., D. Chevalier, ..., B. G. Allen. 2003. Functional endothelin receptors are present on nuclei in cardiac ventricular myocytes. *J. Biol. Chem.* 278:29153–29163.
69. Escobar, M., C. Cardenas, ..., C. Franzini-Armstrong. 2011. Structural evidence for perinuclear calcium microdomains in cardiac myocytes. *J. Mol. Cell. Cardiol.* 50:451–459.
70. Ryall, K. A., D. O. Holland, ..., J. J. Saucerman. 2012. Network reconstruction and systems analysis of cardiac myocyte hypertrophy signaling. *J. Biol. Chem.* 287:42259–42268.
71. Yu, T., C. M. Lloyd, ..., P. M. F. Nielsen. 2011. The physiome model repository 2. *Bioinformatics.* 27:743–744.
72. Thomas, D., S. C. Tovey, ..., P. Lipp. 2000. A comparison of fluorescent Ca<sup>2+</sup> indicator properties and their use in measuring elementary and global Ca<sup>2+</sup> signals. *Cell Calcium.* 28:213–223.
73. Escobar, A. L., C. G. Perez, ..., J. Ramos-Franco. 2012. Role of inositol 1,4,5-trisphosphate in the regulation of ventricular Ca(2+) signaling in intact mouse heart. *J. Mol. Cell. Cardiol.* 53:768–779.

**Biophysical Journal, Volume 119**

**Supplemental Information**

**Ca<sup>2+</sup> Release via IP<sub>3</sub> Receptors Shapes the Cardiac Ca<sup>2+</sup> Transient for Hypertrophic Signaling**

**Hilary Hunt, Agnė Tilūnaitė, Greg Bass, Christian Soeller, H. Llewelyn Roderick, Vijay Rajagopal, and Edmund J. Crampin**



# Supporting Information:

## Ca<sup>2+</sup> release via IP<sub>3</sub> receptors shapes the cytosolic Ca<sup>2+</sup> transient for hypertrophic signalling in ventricular cardiomyocytes

H. Hunt, A. Tilūnaitė, G. Bass, C. Soeller, H.L. Roderick, V. Rajagopal, E.J. Crampin

### Model Equations

Model ODEs are described in the main text and as follows:

$$\frac{d[\text{Ca}^{2+}]_{\text{SR}}}{dt} = \frac{V_{\text{myo}}}{V_{\text{SR}}} \cdot (-I_{\text{RyR}} + I_{\text{SERCA}} - I_{\text{SR1}} - I_{\text{IP}_3\text{R}}) \quad (1)$$

$$\frac{dTnC}{dt} = I_{\text{TnC}} \quad (2)$$

### CaRU model

We use the reduced, Hinch et al. (2004), model of the CaRU as described in Yu et al. (2011). The CaRU is modelled as having four states,  $z_1, z_2, z_3, z_4$ , each describing a different combination of an LTCC and an RyR channel being either open or closed.  $J_{Li}$  and  $J_{Ri}$  are the total flux through the LTCCs and RyRs in state  $i$  respectively. These equations are detailed below.

$$I_{\text{CaL}} = \frac{N}{V_{\text{myo}}} \cdot (z_1 \cdot J_{L1} + z_2 \cdot J_{L2}) \quad (3)$$

$$I_{\text{RyR}} = \frac{N}{V_{\text{myo}}} \cdot (z_1 \cdot J_{R1} + z_3 \cdot J_{R3}) \quad (4)$$

$$\frac{dz_1}{dt} = -(r_1 + r_5) \cdot z_1 + r_2 \cdot z_2 + r_6 \cdot z_3 \quad (5)$$

$$\frac{dz_2}{dt} = r_1 \cdot z_1 - (r_2 + r_7) \cdot z_2 + r_8 \cdot z_4 \quad (6)$$

$$\frac{dz_3}{dt} = r_5 \cdot z_1 - (r_6 + r_3) \cdot z_3 + r_4 \cdot z_4 \quad (7)$$

$$z_4 = 1 - z_1 - z_2 - z_3 \quad (8)$$

$$J_{L1} = J_{Loo} \cdot y_{oo} + J_{Loc} \cdot y_{oc} \quad (9)$$

$$J_{L2} = \frac{J_{Loc} \cdot \alpha_p}{\alpha_p + \alpha_m} \quad (10)$$

$$J_{R1} = y_{oo} \cdot J_{Roo} + J_{Rco} \cdot y_{co} \quad (11)$$

$$J_{R3} = \frac{J_{Rco} \cdot \beta_{pcc}}{\beta_m + \beta_{pcc}} \quad (12)$$

where the CaRU fluxes are described as

$$J_{Rco} = \frac{J_R \cdot ([Ca^{2+}]_{SR} - [Ca^{2+}]_i)}{g_D + J_R} \quad (13)$$

$$J_{Roo} = \begin{cases} \frac{J_R \cdot \left( [Ca^{2+}]_{SR} - [Ca^{2+}]_i + \frac{J_L \cdot FVRT_{Ca}}{g_D} \cdot ([Ca^{2+}]_{SR} - [Ca^{2+}]_o \cdot e^{-FVRT_{Ca}}) \right)}{1 + \frac{J_R}{g_D} + \frac{J_L \cdot FVRT_{Ca}}{1 - e^{-FVRT_{Ca}}}} & |FVRT_{Ca}| > 10^{-5} \\ \frac{J_R \cdot \left( [Ca^{2+}]_{SR} - [Ca^{2+}]_i + \frac{J_L \cdot 10^{-5}}{g_D} \cdot ([Ca^{2+}]_{SR} - [Ca^{2+}]_o \cdot e^{-10^{-5}}) \right)}{1 + \frac{J_R}{g_D} + \frac{J_L \cdot 10^{-5}}{1 - e^{-10^{-5}}}} & \text{otherwise} \end{cases} \quad (14)$$

$$J_{Loc} = \begin{cases} \frac{\frac{J_L \cdot FVRT_{Ca}}{1 - e^{-FVRT_{Ca}}} \cdot ([Ca^{2+}]_o \cdot e^{-FVRT_{Ca}} - [Ca^{2+}]_i)}{1 + \frac{J_L}{g_D} \cdot \frac{FVRT_{Ca}}{1 - e^{-FVRT_{Ca}}}} & |FVRT_{Ca}| > 10^{-5} \\ \frac{\frac{J_L \cdot 10^{-5}}{1 - e^{-10^{-5}}} \cdot ([Ca^{2+}]_o \cdot e^{-10^{-5}} - [Ca^{2+}]_i)}{1 + \frac{J_L}{g_D} \cdot \frac{10^{-5}}{1 - e^{-10^{-5}}}} & \text{otherwise} \end{cases} \quad (15)$$

$$J_{Loo} = \begin{cases} \frac{\frac{J_L \cdot FVRT_{Ca}}{1 - e^{-FVRT_{Ca}}} \cdot ([Ca^{2+}]_o \cdot e^{-FVRT_{Ca}} - [Ca^{2+}]_i + \frac{J_R}{g_D} \cdot ([Ca^{2+}]_o \cdot e^{-FVRT_{Ca}} - [Ca^{2+}]_{SR}))}{1 + \frac{J_R}{g_D} + \frac{J_L}{g_D} \cdot \frac{FVRT_{Ca}}{1 - e^{-FVRT_{Ca}}}} & |FVRT_{Ca}| > 10^{-5} \\ \frac{\frac{J_L \cdot 10^{-5}}{1 - e^{-10^{-5}}} \cdot ([Ca^{2+}]_o \cdot e^{-10^{-5}} - [Ca^{2+}]_i + \frac{J_R}{g_D} \cdot ([Ca^{2+}]_o \cdot e^{-10^{-5}} - [Ca^{2+}]_{SR}))}{1 + \frac{J_R}{g_D} + \frac{J_L}{g_D} \cdot \frac{10^{-5}}{1 - e^{-10^{-5}}}} & \text{otherwise} \end{cases} \quad (16)$$

where

$$FVRT = \frac{FV}{RT} \quad (17)$$

$$FVRT_{Ca} = 2FVRT \quad (18)$$

$F$  being the Faraday constant,  $V$  the voltage across the cell membrane, described later,  $R$  the gas constant and  $T$  the temperature.

CaRU reduced states:

$$r_1 = y_{oc} \cdot \mu_{poc} + y_{cc} \cdot \mu_{pcc} \quad (19)$$

$$r_2 = \frac{\alpha_p \cdot \mu_{moc} + \alpha_m \cdot \mu_{mcc}}{\alpha_p + \alpha_m} \quad (20)$$

$$r_3 = \frac{\beta_m \cdot \mu_{pcc}}{\beta_m + \beta_{pcc}} \quad (21)$$

$$r_4 = \mu_{mcc} \quad (22)$$

$$r_5 = y_{co} \cdot \epsilon_{pco} + y_{cc} \cdot \epsilon_{pcc} \quad (23)$$

$$r_6 = \epsilon_m \quad (24)$$

$$r_7 = \frac{\alpha_m \cdot \epsilon_{pcc}}{\alpha_p + \alpha_m} \quad (25)$$

$$r_8 = \epsilon_m \quad (26)$$

and

$$\exp VL = e^{\frac{V-V_L}{\Delta e t_{VL}}} \quad (27)$$

$$t_R = 1.17 \cdot t_L \quad (28)$$

$$\alpha_p = \frac{\exp VL}{t_L \cdot (\exp VL + 1)} \quad (29)$$

$$\alpha_m = \phi_L / t_L \quad (30)$$

$$\beta_{poc} = \frac{C_{oc}^2}{t_R \cdot (C_{oc}^2 + K_{RyR}^2)} \quad (31)$$

$$\beta_{pcc} = \frac{[Ca^{2+}]_i}{t_R \cdot ([Ca^{2+}]_i^2 + K_{RyR}^2)} \quad (32)$$

$$\beta_m = \frac{\phi_R}{t_R} \quad (33)$$

$$\epsilon_{pco} = \frac{C_{co} \cdot (\exp VL + a)}{\tau_L \cdot K_L \cdot (\exp VL + 1)} \quad (34)$$

$$\epsilon_{pcc} = \frac{[Ca^{2+}]_i \cdot (\exp VL + a)}{\tau_L \cdot K_L \cdot (\exp VL + 1)} \quad (35)$$

$$\epsilon_m = \frac{b \cdot (\exp VL + a)}{\tau_L \cdot (b \cdot \exp VL + a)} \quad (36)$$

$$\mu_{poc} = \frac{(C_{oc}^2 + c \cdot K_{RyR}^2)}{\tau_R \cdot (C_{oc}^2 + K_{RyR}^2)} \quad (37)$$

$$\mu_{pcc} = \frac{[Ca^{2+}]_i^2 + c \cdot K_{RyR}^2}{\tau_R \cdot ([Ca^{2+}]_i^2 + K_{RyR}^2)} \quad (38)$$

$$\mu_{moc} = \frac{\theta_R \cdot d \cdot (C_{oc}^2 + c \cdot K_{RyR}^2)}{\tau_R \cdot (d \cdot C_{oc}^2 + c \cdot K_{RyR}^2)} \quad (39)$$

$$\mu_{mcc} = \frac{\theta_R \cdot d \cdot ([Ca^{2+}]_i^2 + c \cdot K_{RyR}^2)}{\tau_R \cdot (d \cdot [Ca^{2+}]_i^2 + c \cdot K_{RyR}^2)} \quad (40)$$

CaRU states

$$C_{cc} = [\text{Ca}^{2+}]_i \quad (41)$$

$$C_{co} = \frac{[\text{Ca}^{2+}]_i \cdot g_D + J_R \cdot [\text{Ca}^{2+}]_{\text{SR}}}{g_D + J_R} \quad (42)$$

$$C_{oc} = \begin{cases} \frac{g_D \cdot [\text{Ca}^{2+}]_i + \frac{J_L \cdot [\text{Ca}^{2+}]_o \cdot \text{FVRT}_{\text{Ca}} \cdot e^{-\text{FVRT}_{\text{Ca}}}}{1 - e^{-\text{FVRT}_{\text{Ca}}}}}{g_D + \frac{J_L \cdot \text{FVRT}_{\text{Ca}}}{1 - e^{-\text{FVRT}_{\text{Ca}}}}} & |\text{FVRT}_{\text{Ca}}| > 10^{-9} \\ \frac{g_D \cdot [\text{Ca}^{2+}]_i + J_L \cdot [\text{Ca}^{2+}]_o}{g_D + J_L} & \text{otherwise} \end{cases} \quad (43)$$

$$C_{oo} = \begin{cases} \frac{g_D \cdot [\text{Ca}^{2+}]_i + J_R \cdot [\text{Ca}^{2+}]_{\text{SR}} + \frac{J_L \cdot [\text{Ca}^{2+}]_o \cdot \text{FVRT}_{\text{Ca}} \cdot e^{-\text{FVRT}_{\text{Ca}}}}{1 - e^{-\text{FVRT}_{\text{Ca}}}}}{g_D + J_R + \frac{J_L \cdot \text{FVRT}_{\text{Ca}}}{1 - e^{-\text{FVRT}_{\text{Ca}}}}} & |\text{FVRT}_{\text{Ca}}| > 10^{-9} \\ \frac{g_D \cdot [\text{Ca}^{2+}]_i + J_R \cdot [\text{Ca}^{2+}]_{\text{SR}} + J_L \cdot [\text{Ca}^{2+}]_o}{g_D + J_R + J_L} & \text{otherwise} \end{cases} \quad (44)$$

$$\text{denom} = (\alpha_p + \alpha_m) \cdot ((\alpha_m + \beta_m + \beta_{poc}) \cdot (\beta_m + \beta_{pcc}) + \alpha_p \cdot (\beta_m + \beta_{poc})) \quad (45)$$

$$y_{oc} = \frac{\alpha_p \cdot \beta_m \cdot (\alpha_p + \alpha_m + \beta_m + \beta_{pcc})}{\text{denom}} \quad (46)$$

$$y_{co} = \frac{\alpha_m \cdot (\beta_{pcc} \cdot (\alpha_m + \beta_m + \beta_{poc}) + \beta_{poc} \cdot \alpha_p)}{\text{denom}} \quad (47)$$

$$y_{oo} = \frac{\alpha_p \cdot (\beta_{poc} \cdot (\alpha_p + \beta_m + \beta_{pcc}) + \beta_{pcc} \cdot \alpha_m)}{\text{denom}} \quad (48)$$

$$y_{cc} = \frac{\alpha_m \cdot \beta_m \cdot (\alpha_m + \alpha_p + \beta_m + \beta_{poc})}{\text{denom}} \quad (49)$$

## Extracellular exchange and the cell membrane

$$I_{\text{NCX}} = \frac{g_{\text{NCX}} \cdot (e^{\eta \cdot \text{FVRT}} \cdot [\text{Na}^+]_i^3 \cdot [\text{Ca}^{2+}]_e - e^{(\eta-1) \cdot \text{FVRT}} \cdot [\text{Na}^+]_e^3 \cdot [\text{Ca}^{2+}]_i)}{([\text{Na}^+]_e^3 + K_{\text{mNa}}^3) \cdot ([\text{Ca}^{2+}]_e + K_{\text{mCa}}) \cdot (1 + k_{\text{sat}} \cdot e^{(\eta-1) \cdot \text{FVRT}})} \quad (50)$$

$$I_{\text{PMCA}} = \frac{g_{\text{PMCA}} \cdot [\text{Ca}^{2+}]_i}{K_{\text{PMCA}} + [\text{Ca}^{2+}]_i} \quad (51)$$

$$I_{\text{CaB}} = g_{\text{CaB}} \cdot (E_{\text{Ca}} - V) \quad (52)$$

where

$$E_{\text{Ca}} = \frac{RT}{2F} \cdot \ln \left( \frac{[\text{Ca}^{2+}]_o}{[\text{Ca}^{2+}]_i} \right) \quad (53)$$

$$V = \begin{cases} -0.4 \bmod(t, T_{\text{osc}}) & \text{if } \bmod(t, T_{\text{osc}}) \leq 200 \text{ ms} \\ V_0 & \text{otherwise} \end{cases} \quad (54)$$

where  $t$  is the time since the start of the simulation and  $T_{\text{osc}}$  is the period of the driving voltage. The shape of the driving voltage was altered from that described in the original Hinch et al model. Examination of the individual

fluxes in simulations with reduced SERCA revealed that the original step function caused LTCCs to play a larger role than expected. As SERCA function was restricted, flux through LTCCs increased on a scale that resulted in peak amplitude increasing with reduced SERCA solely because of the influx of  $Ca^{2+}$  through LTCCs. This was deemed unlikely to be physiologically plausible and the voltage function reduced to its current form. The effects of this change  $V$  on the base model are negligible.

## Other fluxes across the SR membrane

$$I_{SERCA} = \frac{g_{SERCA} \cdot [Ca^{2+}]_i^2}{K_{SERCA}^2 + [Ca^{2+}]_i^2} \quad (55)$$

$$I_{SR1} = g_{SR1} \cdot ([Ca^{2+}]_{SR} - [Ca^{2+}]_i) \quad (56)$$

$$I_{IP_3R} = \frac{k_f \cdot N_{IP_3R}}{V_{myo}} \cdot P_{IP_3R} \cdot ([Ca^{2+}]_{SR} - [Ca^{2+}]_i) \quad (57)$$

$$(58)$$

where, as described in Sneyd et al. (2017)

$$P_{IP_3R} = \frac{\beta}{\beta + k_\beta \cdot (\beta + \alpha)} \quad (59)$$

Where  $\alpha$  describes the rate of inactivation,  $\beta$  the rate of activation. The parameter  $k_\beta$  is used to fit to data, as in Sneyd et al. (2017)

$$\alpha = (1 - B) \cdot (1 - m \cdot h_\alpha) \quad (60)$$

$$\beta = B \cdot m \cdot h \quad (61)$$

Here  $B$  describes the dependence on  $IP_3$ ,  $m$  the dependence on  $Ca^{2+}$ , and  $h$  and its limit  $h_\alpha$  is a delay factor which also has a dependence on  $Ca^{2+}$ . In this study, we are primarily interested in the dependence of  $IP_3R$  channels on  $Ca^{2+}$  so we fix  $B$  and focus on the other parameters.

$$m = \frac{[Ca^{2+}]_i^4}{K_c^4 + [Ca^{2+}]_i^4} \quad (62)$$

$$\frac{dh}{dt} = \frac{(h_\alpha - h) \cdot (K_t^4 + [Ca^{2+}]_i^4)}{t_{max} \cdot K_t^4} \quad (63)$$

$$h_\alpha = \frac{K_h^4}{K_h^4 + [Ca^{2+}]_i^4} \quad (64)$$

The values  $m$  and  $h_\alpha$  are Hill functions. Together they are controlled by two parameters which determine the  $Ca^{2+}$  dependence of  $IP_3R$  channels:  $K_c$  and  $K_h$ .  $IP_3R$  channels are active at the intersection of these two functions.

## Cytosolic buffers

$$I_{TnC} = k_{mTnC} \cdot (B_{TnC} - TnC) - k_{pTnC} \cdot TnC \cdot [Ca^{2+}]_i \quad (65)$$

$$\beta_{fluo} = \left( 1 + \frac{K_{fluo} \cdot B_{fluo}}{(K_{fluo} + [Ca^{2+}]_i)^2} \right)^{-1} \quad (66)$$

$$\beta_{CaM} = \left( 1 + \frac{K_{CaM} \cdot B_{CaM}}{(K_{CaM} + [Ca^{2+}]_i)^2} \right)^{-1} \quad (67)$$

## NFAT Coupling

Total cellular NFAT is split between four states: nuclear phosphorylated,  $A_{pn}$ , and dephosphorylated,  $A_n$ , and cytosolic phosphorylated,  $A_{pc}$ , and dephosphorylated,  $A_c$  and cycles between them.

$$\frac{dA_n}{dt} = J_2 C_{cn} - J_3 \quad (68)$$

$$\frac{dA_{pn}}{dt} = J_3 - J_4 \quad (69)$$

$$\frac{dA_c}{dt} = J_1 - J_2 \quad (70)$$

$$\frac{dA_{pc}}{dt} = \frac{J_4}{C_{cn}} - J_1 \quad (71)$$

$C_{cn}$  is a scaling factor that accounts for the difference in volume between the cytosol and the nucleus while  $J_1$ ,  $J_2$ ,  $J_3$ , and  $J_4$  are flux terms that describe the movement of NFAT between these four states.

$$J_1 = k_{f,1} A_{pc} N_{\text{NFAT}} f_{\text{CnA}} - k_{r,1} A_c (1 - f_{\text{CnA}}) \quad (72)$$

$$J_2 = k_{f,2} A_c \quad (73)$$

$$J_3 = k_{f,3} A_n (1 - f_{\text{CnA}}) - k_{r,3} A_n N_{\text{NFAT}} f_{\text{CnA}} \quad (74)$$

$$J_4 = k_{f,4} A_{pn} \quad (75)$$

Here  $k_{f,i}$  are forward rate constants in the NFAT phosphorylation reaction,  $k_{r,i}$  are reverse rate constants, and  $f_{\text{CnA}}$  is the fraction of activated calcineurin, given by

$$f_{\text{CnA}} = \frac{[\text{Ca}^{2+}]_i^n}{[\text{Ca}^{2+}]_i^n + K_{m,N}^n \left(1 + \frac{K_{d,1}}{M}\right)} \quad (76)$$

where  $n$  is the Hill coefficient for calcineurin activation,  $K_{m,N}$  is the half-maximal activation concentration of cytosolic  $\text{Ca}^{2+}$  for calmodulin activation for the expected cellular concentration of calmodulin, and  $K_{d,1}$  is the calcineurin-calmodulin dissociation constant. Parameter values for these constants can be found in Table S3.

## Code Availability

CellML code is available on the Physiome Repository at:

<https://models.physiomeproject.org/workspace/5ee>

Matlab code is available on github at:

[https://github.com/CellSMB/compartmental\\_ECC\\_ETC](https://github.com/CellSMB/compartmental_ECC_ETC)

## Parameter sensitivity analysis: Equations for main and total effects

As described in Saltelli et al. (2010), the main and total effects were calculated by generating two sampling matrices  $A$  and  $B$  of model parameter values and then, for each parameter, a matrix  $A_B^{(i)}$  for which all but the  $i$ th column match those of  $A$  and the  $i$ th column is the  $i$ th column of  $B$ .

The main effect of parameter  $i$  is then:

$$S_i = V_{X_i} (E_{X \sim i} (Y | X_i)) / V(Y) \quad (77)$$

$$= V(Y) - \sum_{j=1}^N \left( f(B)_j - f(A_B^{(i)})_j \right)^2 / 2V(Y)N \quad (78)$$

Parameter values used in modelled  $Ca^{2+}$  currents

| Parameter                 | Description                                          | Value                                                     |
|---------------------------|------------------------------------------------------|-----------------------------------------------------------|
| $N$                       | Number of CaRUs in the cell                          | 50 000                                                    |
| $V_{\text{myo}}$          | Myocyte volume                                       | $25.84 \times 10^3 \mu\text{m}^3$                         |
| $N_{\text{IP}_3\text{R}}$ | Number of $\text{IP}_3\text{R}$ channels in the cell | 20 000                                                    |
| $g_{\text{SERCA}}$        | Maximum pump rate of SERCA                           | $0.45 \mu\text{M ms}^{-1}$                                |
| $K_{\text{SERCA}}$        | Half saturation constant of SERCA                    | $0.5 \mu\text{M}$                                         |
| $g_{\text{NCX}}$          | Maximum pump rate of NCX                             | $38.5 \mu\text{M ms}^{-1}$                                |
| $\eta$                    | Voltage dependence of NCX                            | 0.35                                                      |
| $K_{\text{mNa}}$          | $\text{Na}^+$ half saturation of NCX                 | 87.5 mM                                                   |
| $K_{\text{mCa}}$          | $\text{Ca}^{2+}$ half saturation of NCX              | 1.380 mM                                                  |
| $k_{\text{sat}}$          | Low potential saturation factor of NCX               | 0.1                                                       |
| $g_{\text{PMCA}}$         | Maximum pump rate of $\text{Ca}^{2+}$ -ATPase        | $3.5 \text{ nM ms}^{-1}$                                  |
| $K_{\text{PMCA}}$         | Half saturation constant of $\text{Ca}^{2+}$ -ATPase | $38.5 \mu\text{M ms}^{-1}$                                |
| $g_{\text{CaB}}$          | Conductance of background $\text{Ca}^{2+}$ current   | $2.32 \times 10^{-5} \mu\text{M ms}^{-1} \text{ mV}^{-1}$ |
| $g_{\text{SR1}}$          | Pump rate of NCX                                     | $1.8951 \times 10^{-5} \text{ ms}^{-1}$                   |
| $K_t$                     | $\text{IP}_3\text{R}$ delayed response parameter     | $0.1 \mu\text{M}$                                         |
| $t_{\text{max}}$          | $\text{IP}_3\text{R}$ recovery time parameter        | $1000 \text{ s}^{-1}$                                     |

Table S1:  $N_{\text{IP}_3\text{R}}$  from Harzheim et al. (2009). All other values from Hinch et al. (2004)

The total effect of parameter  $i$  is then:

$$S_{T_i} = E_{X \sim i} (V_{X_i}(Y|X \sim i)) / V(Y) \quad (79)$$

$$= \sum_{j=1}^N \left( f(A)_j - f(A_B^{(i)})_j \right)^2 / 2V(Y)N \quad (80)$$

Here we denote  $f(A)_j$  the results of the simulation with parameter in row  $j$  of the sampling matrix  $A$ ;  $V(Y)$  the variance in simulation results across all rows of  $A$  and  $B$ ; and  $N$  the number of rows in  $A$  and  $B$ .

In our parameter analysis, we generated parameter values within the range  $[0, 100]$  using the MATLAB sobolset function with Skip  $1 \times 10^3$  and Leap  $1 \times 10^2$ , scrambled with the Mattousek-Affine-Owen algorithm.  $N$  was set to  $1 \times 10^6$ .

| Fixed ionic concentrations and buffer parameters |                                                   |                                          |
|--------------------------------------------------|---------------------------------------------------|------------------------------------------|
| Ion                                              | Description                                       | Value                                    |
| $[\text{Na}^+]_i$                                | Intracellular sodium                              | 10 mM                                    |
| $[\text{Na}^+]_e$                                | Extracellular sodium                              | 140 mM                                   |
| $[\text{Ca}^{2+}]_e$                             | Extracellular calcium                             | 1 mM                                     |
| $B_{\text{CaM}}$                                 | Total cytosolic concentration of calmodulin       | $50 \times 10^{-3}$ mM                   |
| $K_{\text{CaM}}$                                 | Half saturation constant of calmodulin            | $2.38 \times 10^{-3}$ mM                 |
| $B_{\text{TnC}}$                                 | Total cytosolic concentration of troponin         | $70 \times 10^{-3}$ mM                   |
| $k_{\text{mTnC}}$                                | Dissociation rate of $\text{Ca}^{2+}$ to troponin | $0.04^3 \text{ mM}^{-1} \text{ ms}^{-1}$ |
| $k_{\text{pTnC}}$                                | Binding rate of $\text{Ca}^{2+}$ to troponin      | $0.04 \mu\text{M}^{-1} \text{ ms}^{-1}$  |
| $B_{\text{fluo}}$                                | Concentration of Fluo-4AM dye                     | $1 \times 10^{-3}$ mM                    |
| $K_{\text{fluo}}$                                | Dissociation constant of Fluo-4AM dye             | 1 mM                                     |
| $V_0$                                            | Resting membrane potential                        | -80 mV                                   |

Table S2:  $K_{\text{fluo}}$  and  $B_{\text{fluo}}$  from Thomas et al. (2000). All other values from Hinch et al. (2004)

| Parameter values used to model NFAT4 |                                               |                                                      |
|--------------------------------------|-----------------------------------------------|------------------------------------------------------|
| Parameter                            | Description                                   | Value                                                |
| $C_{cn}$                             | Volume difference between nucleus and cytosol | 50                                                   |
| $k_{f,1}$                            | Rate constant                                 | $7.69 \times 10^{-6} \text{ nM}^{-1} \text{ s}^{-1}$ |
| $k_{f,2}$                            | Rate constant                                 | $1.44 \times 10^{-3} \text{ s}^{-1}$                 |
| $k_{f,3}$                            | Rate constant                                 | $3.62 \times 10^{-4} \text{ s}^{-1}$                 |
| $k_{f,4}$                            | Rate constant                                 | $4.45 \times 10^{-4} \text{ s}^{-1}$                 |
| $k_{r,1}$                            | Rate constant                                 | $1.93 \times 10^{-2} \text{ s}^{-1}$                 |
| $k_{r,3}$                            | Rate constant                                 | $4.71 \times 10^{-5} \text{ nM}^{-1} \text{ s}^{-1}$ |
| $n$                                  | Hill coefficient of calcineurin               | 2.92                                                 |
| $K_{m,N}$                            | Calcium-calcineurin constant                  | 535 nM                                               |
| $K_{d,1}$                            | calcineurin-calmodulin dissociation constant  | 1760 nM                                              |
| $M$                                  | Expected cellular calmodulin concentration    | 6000 nM                                              |

Table S3: Parameters for the parsimonious NFAT model by Cooling et al. (2009)



## Supplementary Figures

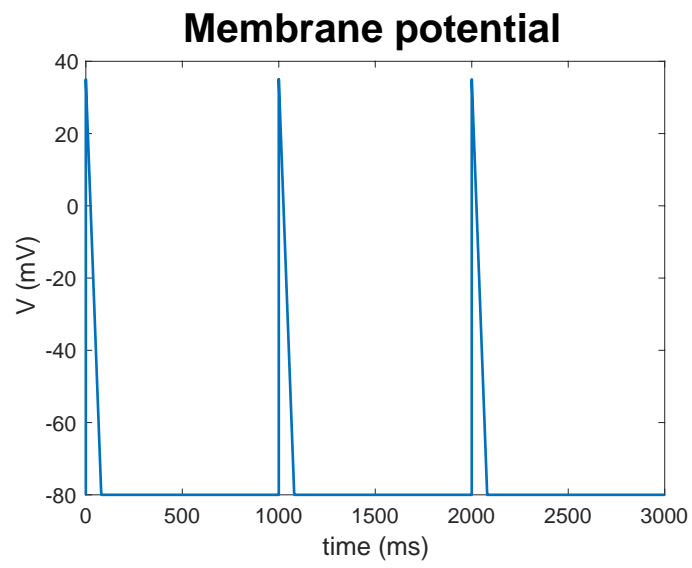

Figure S1: Membrane depolarisation initiating each calcium transient.

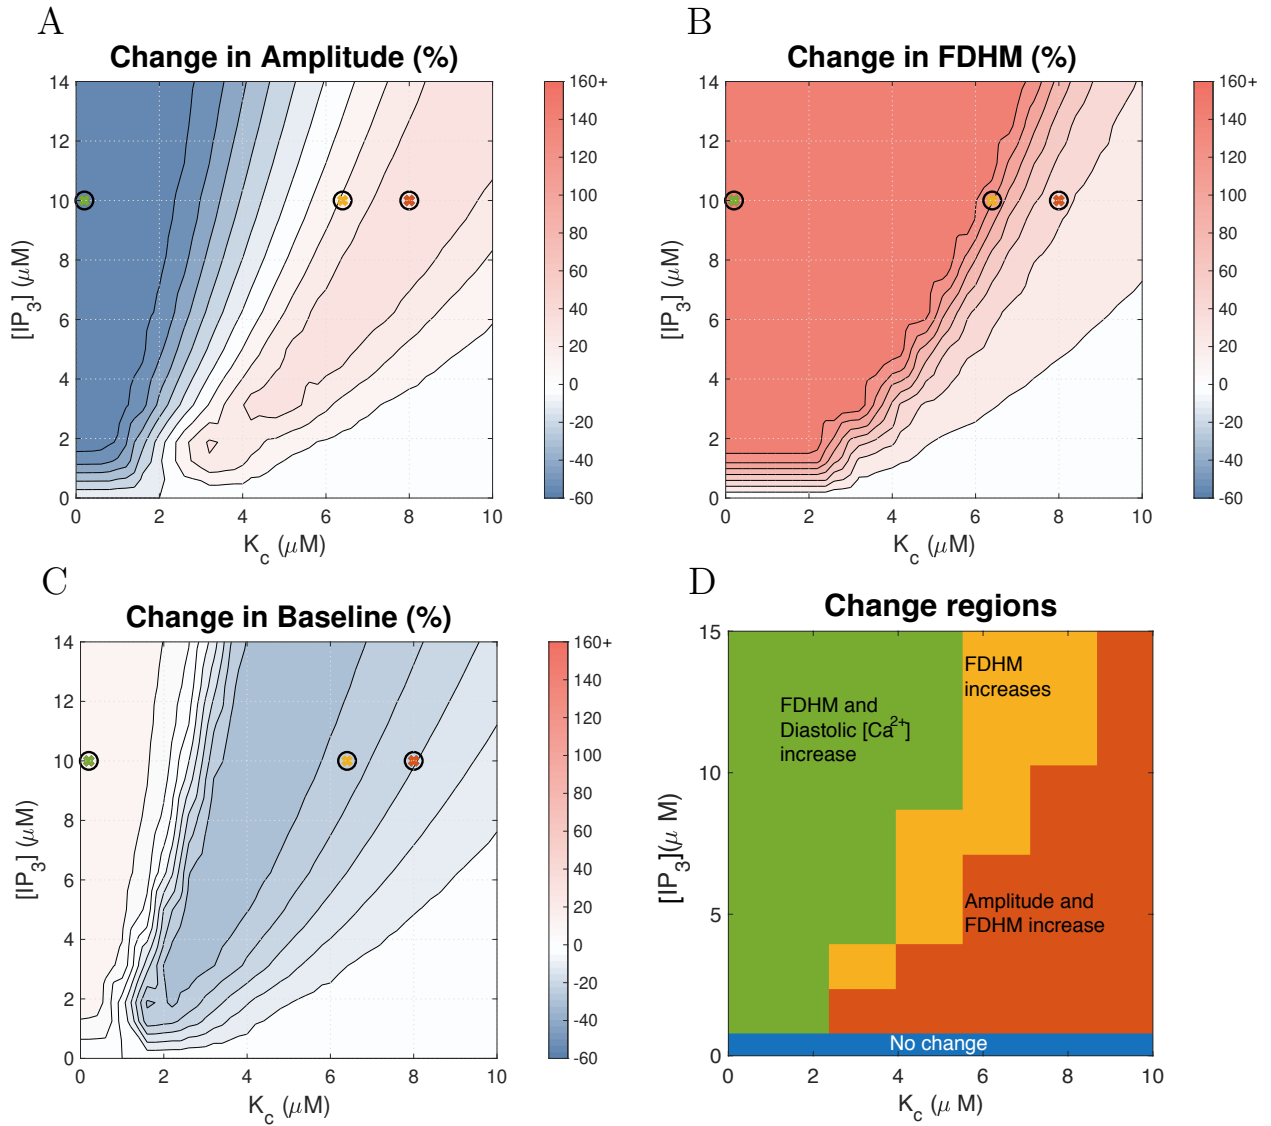

Figure S2: Effect of IP<sub>3</sub> concentration and the parameter  $K_c$  on the calcium transient with large delay and pacing frequency of 0.3 Hz. These two parameters, along with maximum IP<sub>3</sub>R flux, have the greatest impact when considering the effect of IP<sub>3</sub>R activation on the calcium transient.

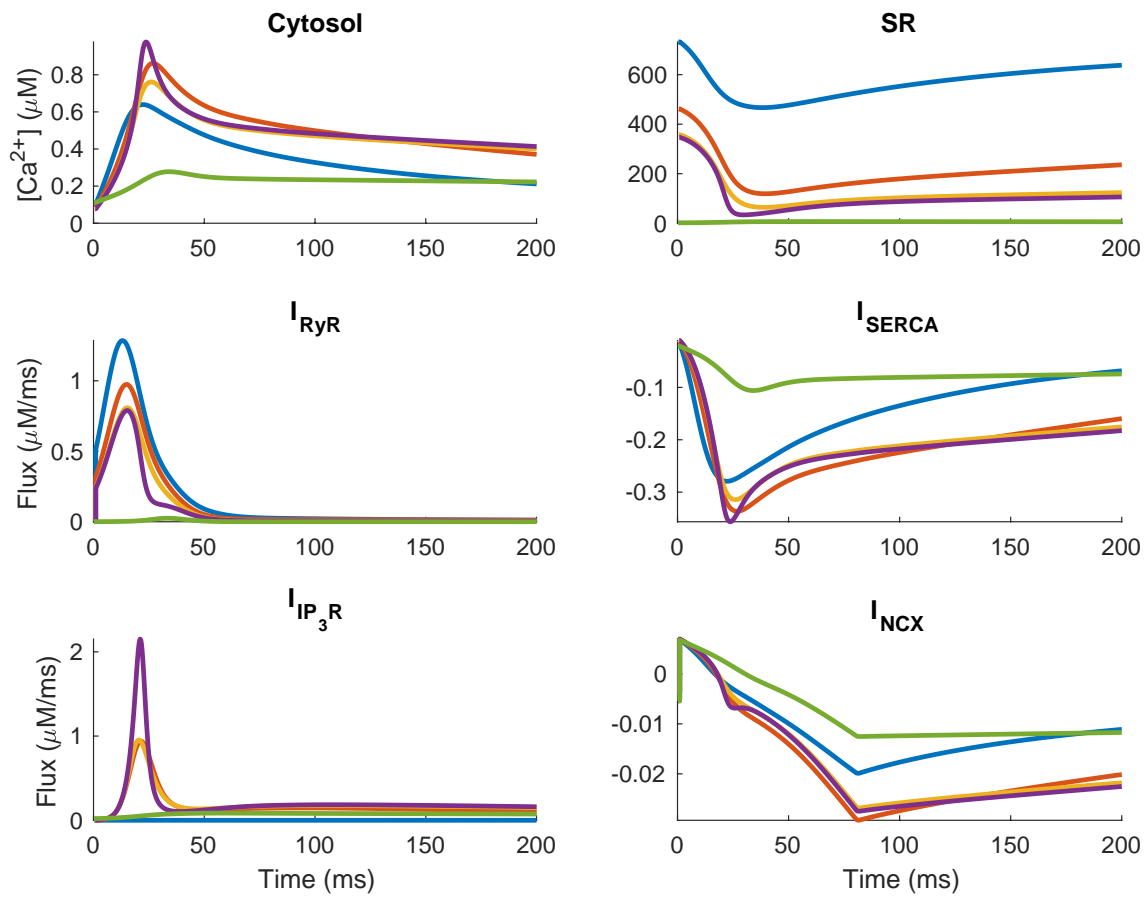

Figure S3: Simulated hypertrophic ECC transient and fluxes with varying  $k_f$ ,  $K_c$ . The sign of  $I_{NCX}$  indicates whether calcium is moving into (positive) or out of (negative) the cell. Parameters here are chosen to show the system behaviour at each region illustrated in Figure 7. The crosses in each of Figures S2 and 7 match the colours of the corresponding transients in this figure.  $IP_3$  concentration is  $10 \mu M$  in all simulations. The model is paced at 0.3 Hz.

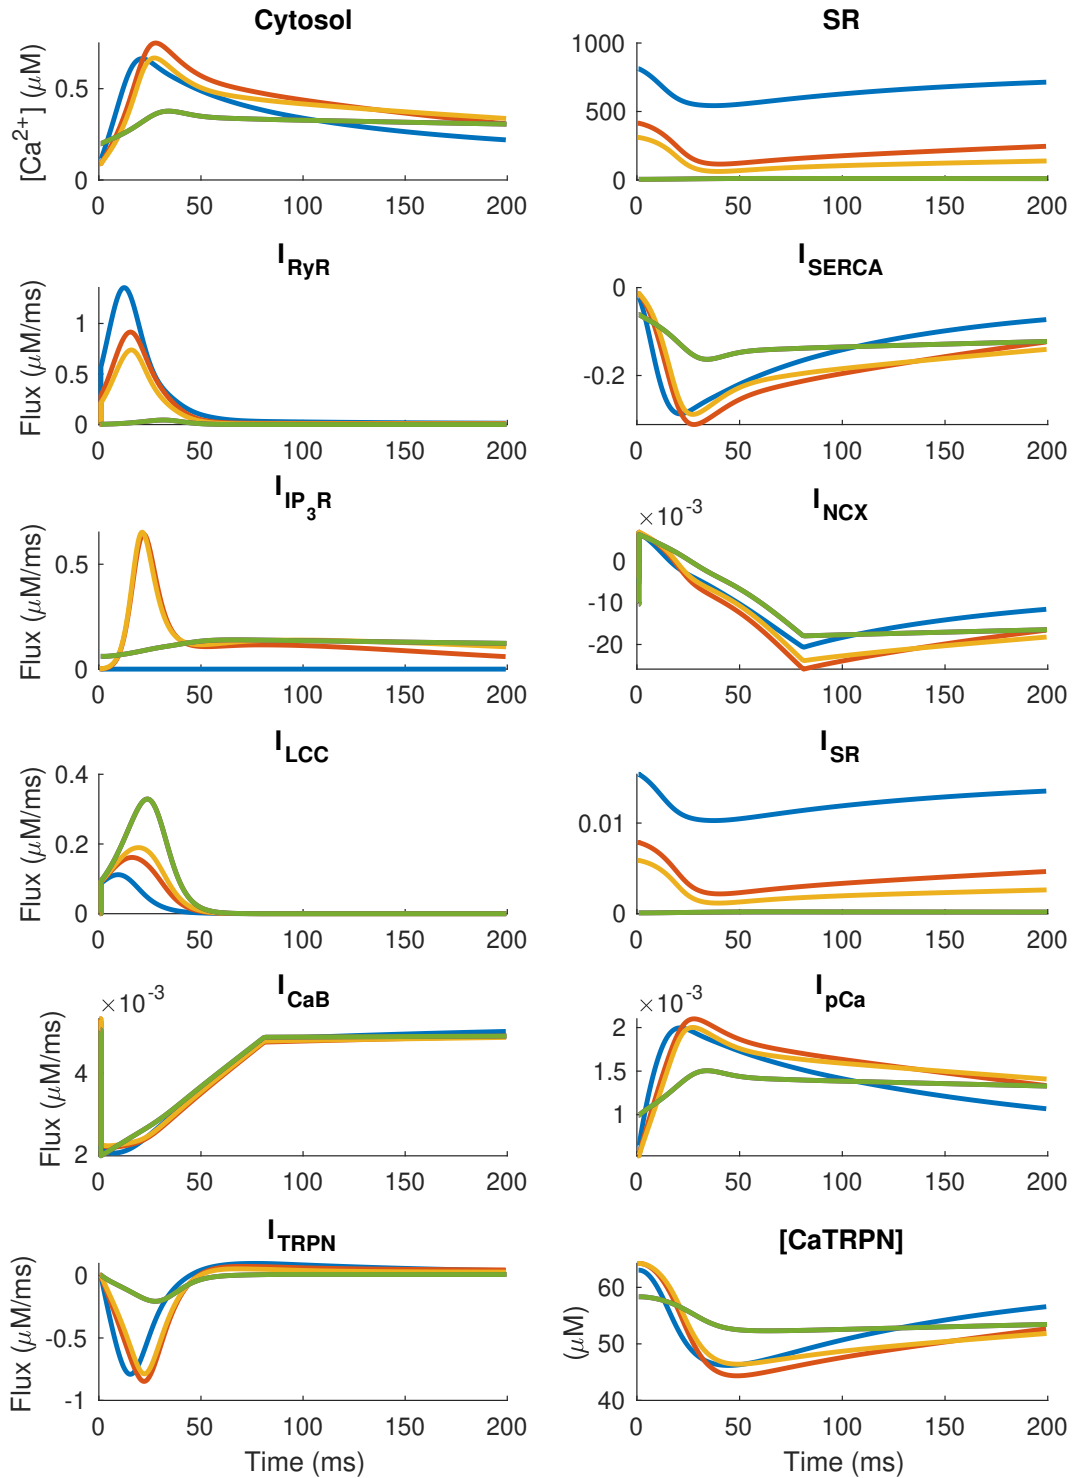

Figure S4: Simulated hypertrophic ECC transient and fluxes with varying  $[IP_3]$ ,  $K_c$ . The sign of  $I_{NCX}$  indicates whether calcium is moving into (positive) or out of (negative) the cell. Parameters here are chosen to show the system behaviour at each region illustrated in Figure 4. The crosses in each of Figures 4 and 6 match the colours of the corresponding transients in this figure.  $IP_3$  concentration is  $10 \mu M$  in all simulations. The model is paced at 1 Hz.

## Supporting References

- Hinch, R., J. L. Greenstein, A. J. Tanskanen, L. Xu, and R. L. Winslow, 2004. A Simplified Local Control Model of Calcium-Induced Calcium Release in Cardiac Ventricular Myocytes. *Biophys. J.* 87:3723–3736.
- Yu, T., C. M. Lloyd, D. P. Nickerson, M. T. Cooling, A. K. Miller, A. Garny, J. R. Terkildsen, J. Lawson, R. D. Britten, P. J. Hunter, and P. M. F. Nielsen, 2011. The Physiome Model Repository 2. *Bioinform.* 27:743–744.
- Sneyd, J., J. M. Han, L. Wang, J. Chen, X. Yang, A. Tanimura, M. J. Sanderson, V. Kirk, and D. I. Yule, 2017. On the Dynamical Structure of Calcium Oscillations. *Proc. Natl. Acad. Sci.* 114:1456–1461.
- Saltelli, A., P. Annoni, I. Azzini, F. Campolongo, M. Ratto, and S. Tarantola, 2010. Variance Based Sensitivity Analysis of Model Output. Design and Estimator for the Total Sensitivity Index. *Comput. Phys. Commun.* 181:259–270.
- Harzheim, D., M. Movassagh, R. S.-Y. Foo, O. Ritter, A. Tashfeen, S. J. Conway, M. D. Bootman, and H. L. Roderick, 2009. Increased InsP(3)Rs in the junctional sarcoplasmic reticulum augment Ca<sup>2+</sup> transients and arrhythmias associated with cardiac hypertrophy. *Proc. Natl. Acad. Sci.* 106:11406–11411.
- Thomas, D., S. C. Tovey, T. J. Collins, M. D. Bootman, M. J. Berridge, and P. Lipp, 2000. A Comparison of Fluorescent Ca<sup>2+</sup>indicator Properties and Their Use in Measuring Elementary and Global Ca<sup>2+</sup>signals. *Cell Calcium* 28:213–223.
- Cooling, M. T., P. J. Hunter, and E. J. Crampin, 2009. Sensitivity of NFAT cycling to cytosolic calcium concentration: implications for hypertrophic signals in cardiac myocytes. *Biophys. J.* 96:2095–2104.
